1 **Evolution of phenotypic variance provides insights into the genetic basis of**  
2 **adaption**

3 **Author list:**

4 Wei-Yun Lai<sup>1,2</sup>, Viola Nolte<sup>1</sup>, Ana Marija Jakšić<sup>1,2,3</sup> and Christian Schlötterer<sup>1\*</sup>

5 <sup>1</sup>Institut für Populationsgenetik, Vetmeduni Vienna, Vienna, Austria.

6 <sup>2</sup>Vienna Graduate School of Population Genetics, Vetmeduni Vienna, Vienna, Austria.

7 <sup>3</sup>Current affiliation: École polytechnique fédérale de Lausanne, Lausanne, Switzerland

8 \*Correspondence: [christian.schloetterer@vetmeduni.ac.at](mailto:christian.schloetterer@vetmeduni.ac.at); Tel.: +43-1-25077-4300.

9

10 **Keywords:**

11 Phenotypic variance, temperature adaptation, *Drosophila simulans*, experimental evolution

12 **Abstract**

13 Most traits are polygenic and the contributing loci can be identified by GWAS. Their  
14 adaptive architecture is, however, poorly characterized. Here, we propose a new approach to  
15 study the adaptive architecture, which does not depend on genomic data. Relying on  
16 experimental evolution we measure the phenotypic variance in replicated populations during  
17 adaptation to a new environment. Extensive computer simulations show that the evolution of  
18 phenotypic variance in a replicated experimental evolution setting is a powerful approach to  
19 distinguish between oligogenic and polygenic adaptive architectures. We apply this new  
20 method to gene expression variance in male *Drosophila simulans* before and after 100  
21 generations of adaptation to a novel hot environment. The variance change in gene  
22 expression was indistinguishable for genes with and without a significant change in mean  
23 expression after 100 generations of evolution. We conclude that adaptive gene expression  
24 evolution is best explained by a highly polygenic adaptive architecture. We propose that the  
25 evolution of phenotypic variance provides a powerful approach to characterize the adaptive  
26 architecture, in particular when combined with genomic data.

27

## 28 **Introduction**

29 It is widely accepted that most complex traits have a polygenic or even infinitesimal basis  
30 (Ayroles et al., 2009; Boyle et al., 2017; Liu et al., 2019). Nevertheless, it is difficult to  
31 predict which of these loci are responding to selection when a population is exposed to a new  
32 selection regime. If pleiotropic constraints are strong, only a small subset of the genes  
33 constituting are free to respond to selection. Hence, the genetic basis of the  
34 adaptive response of a complex trait (i.e. adaptive architecture (Barghi et al., 2020)) may  
35 differ substantially from the genetic architecture. Since even for large phenotypic changes the  
36 genetic basis of an adaptive response is difficult to study when more than a handful of genes  
37 are contributing, we introduce a new approach to study the complexity of the adaptive  
38 architecture. Rather than aiming to map the contributing loci, we propose to study the  
39 evolution of phenotypic variance in an experimental evolution framework.

40

41 The phenotypic variance of a quantitative trait is a key determinant for its response to  
42 selection. It can be decomposed into genetic and environmental components (Falconer and  
43 Mackay, 1963). Over the past years, mathematical models have been developed which  
44 describe the expected genetic variance of a quantitative trait under selection and its  
45 maintenance in evolving populations (Bulmer, 1972; Chevalet, 1994; Kimura and Crow,  
46 1964; Turelli, 1984). For infinitely large populations and traits controlled by many  
47 independent loci with infinitesimal small effect, changes in trait optimum are not expected to  
48 affect the phenotypic variance (Lande, 1976). A much more complex picture is expected  
49 when the effect sizes are not equal, the population size is finite, or the traits have a simpler  
50 genetic basis (Barton and Keightley, 2002; Barton and Turelli, 1987; Franssen et al., 2017;  
51 Hayward and Sella, 2019; Jain and Stephan, 2015; Keightley and Hill, 1989). For instance,  
52 for a trait with oligogenic architectures, the genetic variance could drop dramatically during

53 adaptation, while with polygenic architectures, only minor effects on the variance are  
54 expected (Barton et al., 2017; Franssen et al., 2017; Jain and Stephan , 2015). These studies  
55 suggest that a time-resolved analysis of phenotypic variance has the potential to shed light  
56 onto the complexity of the underlying adaptive architecture.

57

58 Despite its potential importance for the understanding of adaptation, we are faced with the  
59 situation that very few empirical data are available for the evolution of phenotypic variance.  
60 The use of natural populations to study changes in phenotypes and even more so phenotypic  
61 variances is limited, as the environmental heterogeneity cannot be controlled. A  
62 complementary approach to study the evolution of phenotypic variance is experimental  
63 evolution (Kawecki et al., 2012). With replicated populations starting from the same founders  
64 and evolving under tightly controlled environmental conditions, experimental evolution  
65 provides an enormous potential to study the evolution of phenotypic variance.

66

67 Most experimental evolution studies in sexual populations focused on the evolution of  
68 phenotypic means, rather than variance (Burke et al., 2010; Chippindale et al., 1996; Jakšić et  
69 al., 2020; Mallard et al., 2018). A notable exception is a study which applied fluctuating,  
70 stabilizing and disruptive selection to a small number of traits (wing shape) and observed a  
71 change of the phenotypic variance (Pélabon et al., 2010). Instead of looking at a preselected  
72 subset of phenotypes which limits the generality, we will focus on gene expression, a set of  
73 molecular phenotypes, which can be easily quantified since microarrays and, more recently,  
74 RNA-Seq have become available. Importantly, the expression levels of genes exhibit the  
75 same properties (e.g.: continuity and normality) as other complex quantitative traits  
76 (Mackay et al., 2009). Thus, gene expression has also been widely employed to search for  
77 putative adaptive traits of locally adapted populations (Romero et al., 2012; Signor and

78 Nuzhdin, 2018; Sork, 2017) or ancestral and evolved populations in the context of  
79 experimental evolution (Ferea et al., 1999; Huang and Agrawal, 2016; Lenski et al., 1994;  
80 Mallard et al., 2018).

81  
82 In this study, we used forward simulations that match not only essential design features of  
83 typical experimental evolution studies, but also incorporate realistic parameters of the genetic  
84 architecture. We recapitulate the classic expectations that even a moderately polygenic  
85 architecture is associated with a high stability of the phenotypic variance of a selected trait  
86 across different phases of adaptation. Applying this insight to a real dataset (Barghi et al.,  
87 2019; Hsu et al., 2020; Jakšić et al., 2020), we show that a considerable set of genes changed  
88 their mean expression, but their expression variance was indistinguishable from genes  
89 without changes in mean expression. We propose that this pattern reflects that adaptive gene  
90 expression evolution generally has a polygenic basis.

91

## 92 **Results**

93 The central idea of this study is that the complexity of an adaptive trait can be estimated from  
94 the trajectory of the phenotypic variance during adaptation: the phenotypic variance remains  
95 relative stable for a trait with polygenic (infinitesimal) architecture while it changes across  
96 generations for a trait with oligogenic architecture. Although this prediction has been  
97 illustrated in multiple theoretical and simulation studies (e.g.: Barton et al., 2017; Franssen et  
98 al., 2017; Jain and Stephan, 2015), as the first step of this study, we explored to what extent it  
99 can be generalized to a typical E&R setting considering a broader parameter space. Assuming  
100 additivity and a negative correlation between ancestral allele frequency and effect size (Otte  
101 et al., 2020) (Figure 1b), we simulated traits adapting to a mild/distant shift in trait optimum  
102 with weak/intermediate/strong stabilizing selection (Figure 1a and Figure 1 – Figure

103 supplement 1). With three different distributions of effect size (Figure 1c) we investigate how  
104 the number of contributing loci affects the phenotypic variance.

105

106 We monitored the change in phenotypic variance over 200 generations, which was sufficient  
107 to reach the trait optimum for most parameter combinations (Figure 2 – Figure supplement 4  
108 and 5). We compared the change in variance relative to the start of the experiment in  
109 populations with and without selection. First, we studied a mild (one standard deviation of  
110 the ancestral phenotypic distribution) shift in trait optimum (Figure 2 and Figure 2 – Figure  
111 supplement 2). As expected for a founder population derived from a substantially larger  
112 natural population, we find that even under neutrality the phenotypic variance does not  
113 remain constant, but gradually decreases during 200 generations of experimental evolution  
114 (Figure 2). This loss of variance is best explained by the fixation of variants segregating in  
115 the founder population and we did not simulate new mutations, as they do not contribute to  
116 adaptation in such short time scales (Burke et al., 2010). Our simulations show that even  
117 experimental evolution studies with moderate population sizes and linkage very nicely  
118 recapitulate the patterns from previous studies (Barton et al., 2017; Franssen et al., 2017; Jain  
119 and Stephan , 2015). A pronounced drop in phenotypic variance is observed while a trait is  
120 approaching a shifted optimum with few contributing loci (Figure 2). When more loci are  
121 contributing to the selected phenotype, the difference to neutrality becomes very small  
122 (Figure 2 and Figure 2 - Figure supplement 2). In addition to the number of contributing loci,  
123 also the heterogeneity in effect size among loci and the shape of the fitness function have a  
124 major impact. The larger the difference in effect size is, the more pronounced was the  
125 influence of the number of contributing loci (Figure 2). The opposite effect was seen for the  
126 width of the fitness function – a larger variance decreased the influence of the number of  
127 contributing loci (Figure 2). Importantly, these patterns were not affected by the duration of

128 the experiment-qualitatively identical patterns were seen at different time points until  
129 generation 200.

130

131 For a more distant trait optimum (three standard deviations of the ancestral phenotypic  
132 distribution), we noticed some interesting dynamics that were not apparent for a closer trait  
133 optimum (Figure 2 – Figure supplement 1 and 3). The most striking one was the temporal  
134 heterogeneity of the phenotypic variance for few contributing loci of unequal effects. During  
135 the early stage of adaptation, the variance increased and dropped later below the variance in  
136 the founder population. With an increasing number of contributing loci, this pattern  
137 disappeared and closely matched the neutral case (Figure 2 – Figure supplement 1).  
138 Modifying dominance did not change the overall patterns-with a large number of contributing  
139 loci the variance fitted the neutral pattern best (Figure 2 – Figure supplement 6). Overall, our  
140 simulations indicate that only for a small set of parameters, the variance will increase during  
141 the early stage of adaptation - in particular scenarios based on a few contributing loci with  
142 very different effect sizes. The large influence of key parameters of the adaptive architecture,  
143 in particular the number of contributing loci and their effect sizes on the temporal phenotypic  
144 variance dynamics, suggest that it should be possible to exploit this for a test of polygenic  
145 adaptation, which is independent from genomic data.

146

147 As a proof of principle, we studied the evolution of gene expression variance in replicated  
148 populations evolving in a new hot temperature regime (Barghi et al., 2019; Hsu et al., 2020;  
149 Jakšić et al., 2020). The evolved populations were derived from the same ancestral  
150 population, but evolved independently for 100 generations in a novel temperature regime  
151 with daily temperature fluctuations between 18 and 28°C (Figure 3a). Rather than relying on  
152 pooled samples that allow only to estimate means, we quantified gene expression of

153 individuals from reconstituted ancestral populations and two evolved populations in a  
154 common garden setup. Similar to previous studies (Ayroles et al., 2009; Huang et al., 2015),  
155 we estimated a heritability of around 60% across the transcriptome among individual flies  
156 from different families, which demonstrates the robustness of our experimental setup to  
157 estimate expression variances (Method – Figure supplement 1; See Materials and methods).  
158 Principle Component Analysis (PCA) indicated that 11.9% of the variation in gene  
159 expression can be explained by the first PC which separates evolved and ancestral  
160 populations, reflecting clear adaptive gene expression changes in response to the novel, hot  
161 temperature regime (Figure 3b). The means and variances of the expression of each gene  
162 were estimated and compared between the reconstituted ancestral populations and the two  
163 evolved populations (Method – Figure supplement 2 and 3; See Materials and methods). Due  
164 to the usage of different lot numbers for the RNA-Seq library preparation (Supplementary file  
165 1), we only contrasted ancestral and evolved samples generated with the same lot number  
166 (See Materials and methods) to avoid any unnecessary confounding results.

167

168 The comparison of ancestral and evolved populations identified 2,812 genes in the first  
169 replicate and 2,704 genes in the second replicate which significantly changed mean  
170 expression in the evolved flies (FDR<0.05, Supplementary file 2). With about 20% of the  
171 genes changing mean expression, it is apparent that both populations evolved during 100  
172 generations of exposure to a novel environment. 93.8% of the genes with a significant mean  
173 expression change in both populations changed in the same direction, more than expected by  
174 chance (Figure 4a,  $\chi^2 = 896.34$ , p-value <  $2.2 \times 10^{-16}$ ). This concordance suggests that  
175 most of the altered expression means are mainly driven by selection, rather than by drift. We  
176 quantified the expression change by relating the change in gene expression to the standard  
177 deviation in the ancestral population. The differentially expressed genes in both replicates



178 showed a broad distribution of expression change, but the mean expression changed by one  
179 standard deviation (Figure 4b). Assuming that all expression phenotypes reached trait  
180 optimum, this reflects on average a moderate shift in trait optimum.

181

182 Consistent with computer simulations, the analysis of gene expression variance showed a  
183 slight decrease in evolved populations relative to the ancestral ones (median F-value = 0.84 in  
184 both replicates). Only a small subset of gene (n=125 and 97 in each replicate) experienced a  
185 substantial reduction in variance. Because this reduction in variance is probably driven by a  
186 different evolutionary force, we discuss them elsewhere (Lai et al., 2021). For the remaining  
187 genes, we related the changes in gene expression variance of selected genes to non-selected  
188 ones, we tested whether the variance changes in expression differ between the genes with  
189 significant mean expression changes and those without. Hence, we assume that genes with  
190 significant mean expression changes are under selection and the rest of the transcriptome has  
191 no large effect on the fitness (neutral). Remarkably, the changes in variance of putative  
192 adaptive genes with significant mean expression changes are indistinguishable from the genes  
193 that do not change their mean expression (Figure 4c). This suggests that the selection on  
194 mean expression is independent from the change in variance during adaptation in the focal  
195 populations. While variance estimates from two time points do not provide sufficient power  
196 to estimate the number of contributing loci in absence of more information about the adaptive  
197 architecture, our computer simulations (Figure 2), suggest in line with previous theoretical  
198 work (Barton et al., 2017; Jain and Stephan, 2015) that the observed stability in variance  
199 evolution reflects a polygenic architecture underlying the adaptive gene expression evolution.

200

201 Since we only explored two time points rather than a full time series, it may be possible that  
202 an oligogenic basis could also result in a similar phenotypic variance change as a polygenic

203 architecture (Figure 2 – Figure supplement 1 and 3). This can be seen in an intuitive case  
204 when a single/few major effect allele(s) starts at a low frequency and becomes fixed (Yoo et  
205 al., 1980). Because an oligogenic basis results in a highly parallel genomic selection response  
206 (Figure 2 – Figure supplement 7), it is possible to distinguish polygenic and oligogenic  
207 architectures with phenotypes from two time points only, when genomic data are available.  
208 Because the genomic signature in the same experiment uncovered a highly heterogeneous  
209 selection response (Barghi et al., 2019), we can exclude the unlikely explanation of an  
210 oligogenic architecture resulting in a similar expression variance as non-selected genes.  
211 Rather, we conclude that the adaptive response in gene expression is best explained by a  
212 highly polygenic architecture.

## 213 **Discussion**

214 Population genetics has a long tradition to characterize adaptation based on the genomic  
215 signature of selected loci (Nielsen, 2005). Nevertheless, for selected phenotypes with a  
216 polygenic architecture, the contribution of individual loci to phenotypic change may be too  
217 subtle to be detected with classic population genetic methods (Pritchard et al., 2010). Even  
218 with an oligogenic basis, the identification of the selection targets with classic population  
219 genetic tests can be challenging.

220

221 Here, we used a conceptually different approach, which does not build on the genomic  
222 signature, to infer the adaptive architecture. Reasoning that experimental evolution is  
223 probably the best approach to obtain phenotypic time series, we performed computer  
224 simulations specifically tailored to typical experimental evolution studies with *Drosophila*.  
225 We showed that the temporal dynamics of the phenotypic variance is strongly affected by the  
226 number of contributing loci and other parameters of the adaptive architecture, such as the  
227 distribution of effect size and the underlying fitness function. Similar to the classic  
228 Castle-Wright estimator (Castle, 1921) that estimates the number of loci contributing to a  
229 quantitative trait from the phenotypic variance of the F<sub>2</sub>, we propose that the temporal  
230 heterogeneity of the phenotypic variance can be used to estimate the number of loci  
231 contributing to the adaptive response of a phenotype as well as other parameters of the  
232 adaptive architecture. Hence, unlike other approaches to characterize polygenic adaptation,  
233 the proposed estimator does not require genetic data when phenotypic time series data are  
234 available.

235

236 Because gene expression changes are constituting a major component of adaptation to a novel  
237 environment (Romero et al., 2012; Signor and Nuzhdin, 2018; Sork, 2017), it provides an

238 excellent model to evaluate a variance-based test for polygenicity. Gene expression is  
239 modified by many trans-acting factors and some cis-regulatory variation. Adaptive gene  
240 expression changes can be either driven by polymorphism in *cis*-regulatory elements or by  
241 *trans*-acting variants. While interspecific differences in gene expression are predominantly  
242 caused by *cis*-regulation (Wittkopp et al., 2004), intraspecific variation is mostly driven by  
243 trans regulatory changes (Suvorov et al., 2013; Wittkopp et al., 2008). Adaptive gene  
244 expression changes which are well-characterized on the molecular level typically have a  
245 *cis*-regulatory basis that is not only frequently associated with the insertion of a transposable  
246 element (e.g.: (Daborn et al., 2002)) but also sometimes with multiple regulatory variants  
247 (Endler et al., 2018). Two lines of evidence suggest that cis-regulatory variation cannot be the  
248 driver of adaptive gene expression changes observed in this study. First, the mutational target  
249 size is too small to harbor a sufficiently large number of alleles segregating in the founder  
250 population. Second, too few recombination events occur during the experiment to uncouple  
251 regulatory variants located on a given haplotype such that they could generate a signal of  
252 polygenic adaptation. More likely, the polygenic adaptive architecture of gene expression  
253 change reflects the joint effects of many *trans*-acting variants.

254

255 Because we could only analyze phenotypic data from two time points, the founder population  
256 and replicate populations evolved for 100 generations, we were not able to obtain a more  
257 quantitative estimate of the number of contributing loci, in particular as other parameters of  
258 the adaptive architecture are not known and need to be co-estimated. For the distinction  
259 between an oligogenic and polygenic basis, we additionally relied on the heterogeneity of  
260 genomic selection signatures among replicates, because for some parameter combinations the  
261 oligogenic response can also result in a similar phenotypic variance as a polygenic one, but  
262 with a much higher parallel response of genomic markers (Figure 2 – Figure supplement 7).

263 Hence, not only more time points describing the phenotypic trajectory, but also some  
264 genomic data could contribute to infer the adaptive architecture in experimental evolution  
265 studies. The extension of this approach to natural populations faces several challenges. First,  
266 phenotypic time series over evolutionary relevant time scales are rare (but see (Clutton-Brock  
267 and Pemberton, 2004)) and second, the distinction of environmental heterogeneity from  
268 genetic changes is considerably more challenging than under controlled laboratory  
269 conditions.  
270  
271

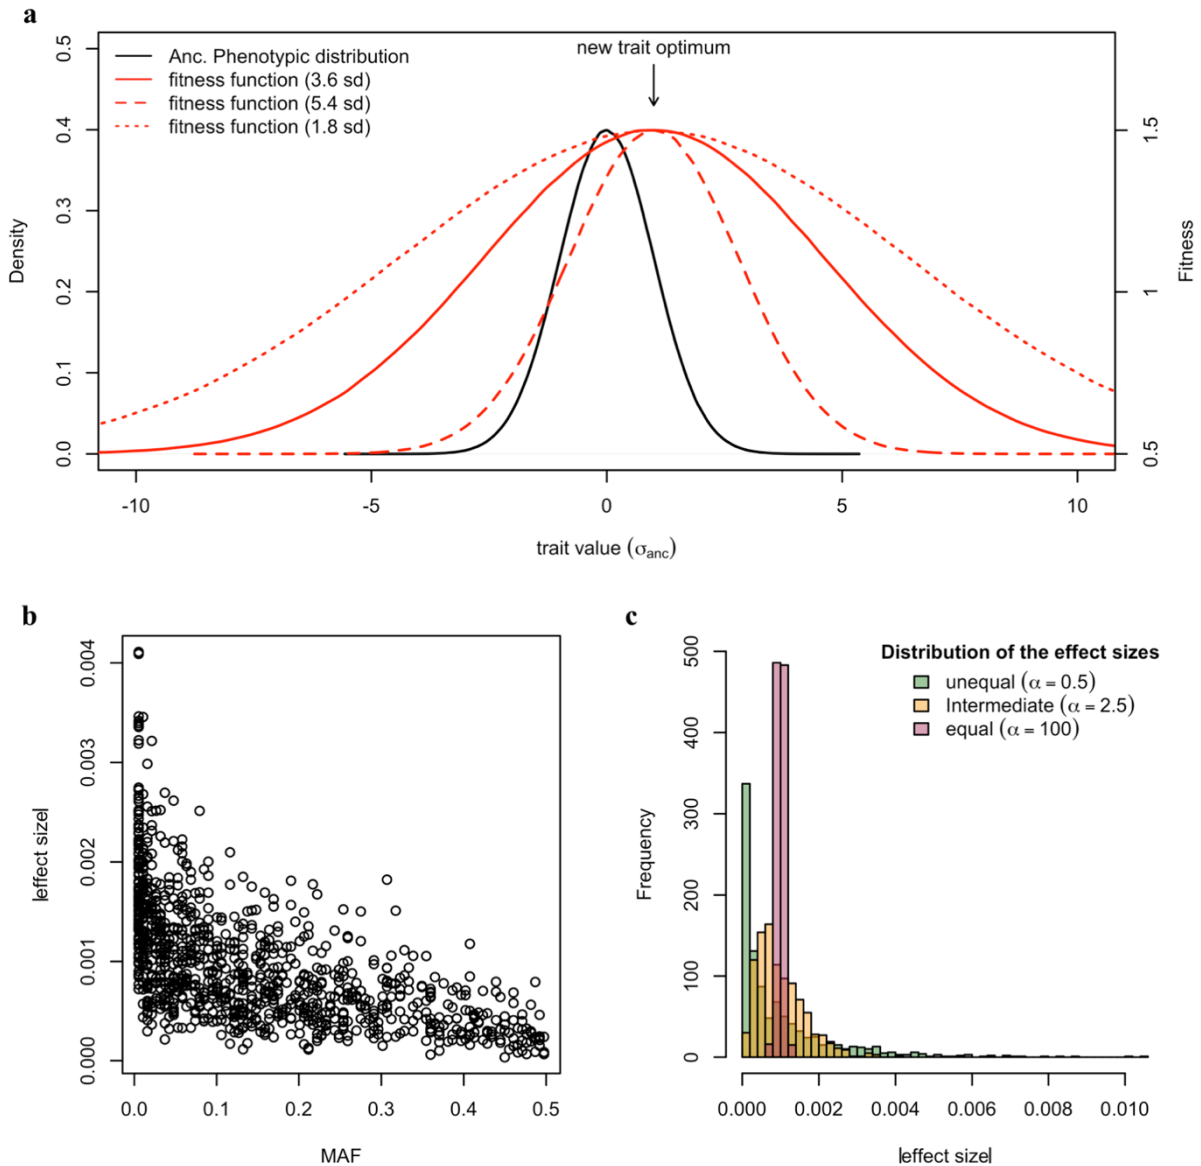

272

273 **Figure 1. Simulating polygenic adaptation to a shift in trait optimum with different**

274 **parameter combinations. a.** For the computer simulations we consider a quantitative trait

275 (in black) experiencing a sudden shift in trait optimum under stabilizing selection. The

276 underlying fitness functions are illustrated in red. The new trait optimum is shifted from the

277 ancestral trait mean by one/three standard deviation of the ancestral trait distribution. The

278 strength of stabilizing selection is modified by changing the variance of the fitness function:

279 1.8, 3.6 and 5.4 standard deviations of the ancestral trait distribution. **b.** The negative

280 correlation between the allele frequencies and the effect sizes ( $r = -0.7$ , estimated in Barghi *et*

281 *al.*, 2019). We consider such negative correlation when assigning the effect sizes to variants  
282 underlying a simulated trait. **c.** The distribution of effect sizes of the contributing loci is  
283 determined by the shape parameter ( $\alpha$ ) of gamma sampling process ( $\alpha = 0.5, 2.5$  and 100).  
284

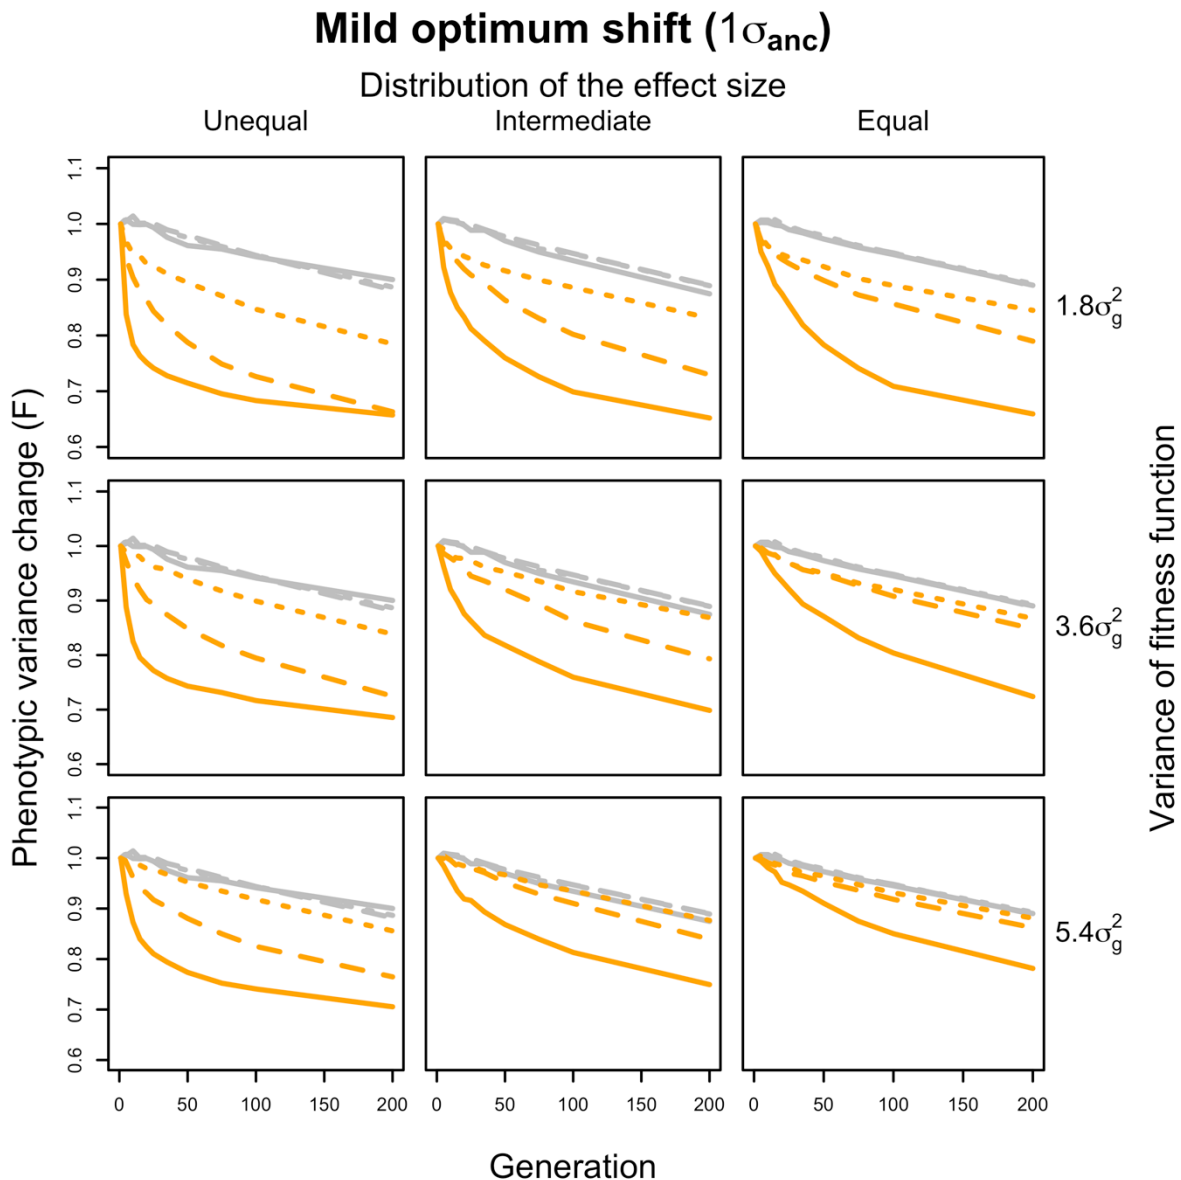

285

286 **Figure 2. The trajectory of changes in phenotypic variance during adaptation to a mild**

287 **optimum shift.** The changes in phenotypic variance within 200 generations adapting to a

288 moderate optimum shift (orange) are compared to the changes under neutrality (grey) on y

289 axis. The change in variance (F) is calculated as the ratio of phenotypic variance between

290 each evolved time point (generation  $x$ ) and the ancestral state ( $\sigma_x^2/\sigma_0^2$ ). The simulations cover

291 traits controlled by varying numbers of loci underlying the adaptation with three different

292 distributions of effect sizes (columns) under different strength of stabilizing selection (rows).

293 For each scenario, 1000 runs of simulations have been performed. Only traits with the most



294 (dotted lines, 1000 loci), intermediate (dash lines, 50 loci) and the least (solid lines, 5 loci)  
295 polygenic architectures are shown. In all scenarios, the variance of the trait decreases  
296 drastically when the adaptation is controlled by a small number of loci (orange solid lines; 5  
297 loci). While, for traits with extremely polygenic basis, the phenotypic variance stays stable  
298 over time (orange dotted lines).  
299

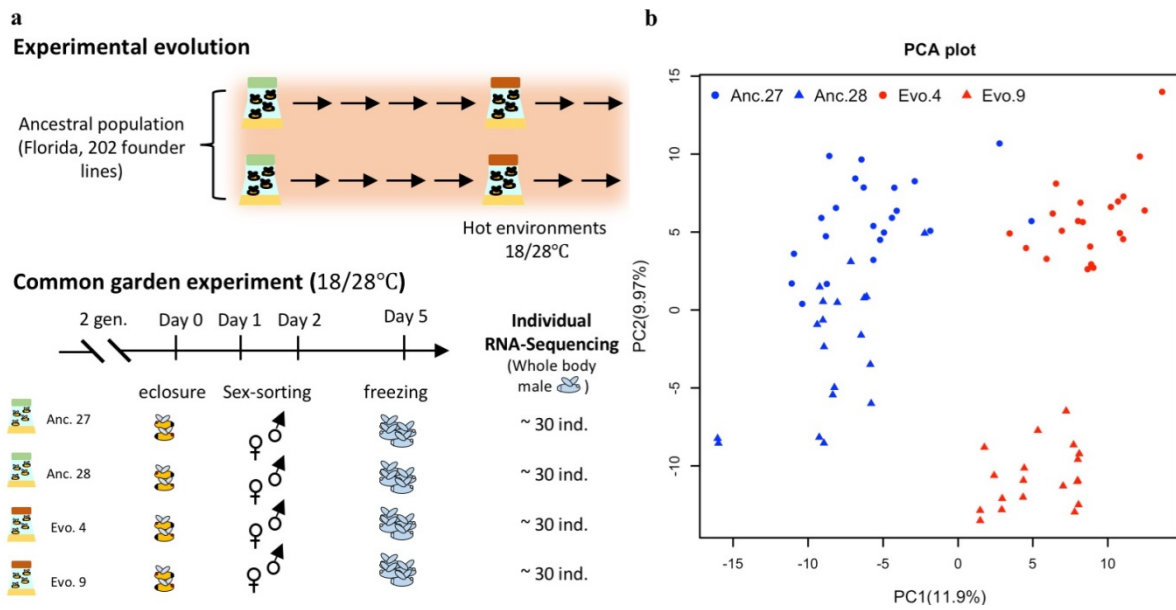

300

301 **Figure 3. Schematic overview of the experimental procedures (a) and the divergence in**

302 **gene expression during experimental evolution (b). a. Experimental evolution: starting**

303 from one common founder population, two replicate populations evolved for 100 generations

304 in a hot laboratory environment fluctuating between 18 and 28°C. Common garden

305 Experiment: after 100 generations, the two evolved replicate populations were maintained

306 together with the reconstituted ancestral population for two generations in a hot laboratory

307 environment fluctuating between 18 and 28°C. After this common garden procedure, about

308 30 males from each population were subjected to RNA-Seq. **b. Principle Component**

309 **Analysis (PCA) of the transcriptomic profiles of individuals from the ancestral population**

310 (blue) and the hot-evolved population (red). Circles indicate individuals of the first replicate

311 (Anc. No. 27 and Evo. No. 4). Triangles represent individuals of the second replicate (Anc.

312 No. 28 and Evo. No. 9). The two replicates were made with two different batches of library

313 cards for RNA-Seq library preparation.

314

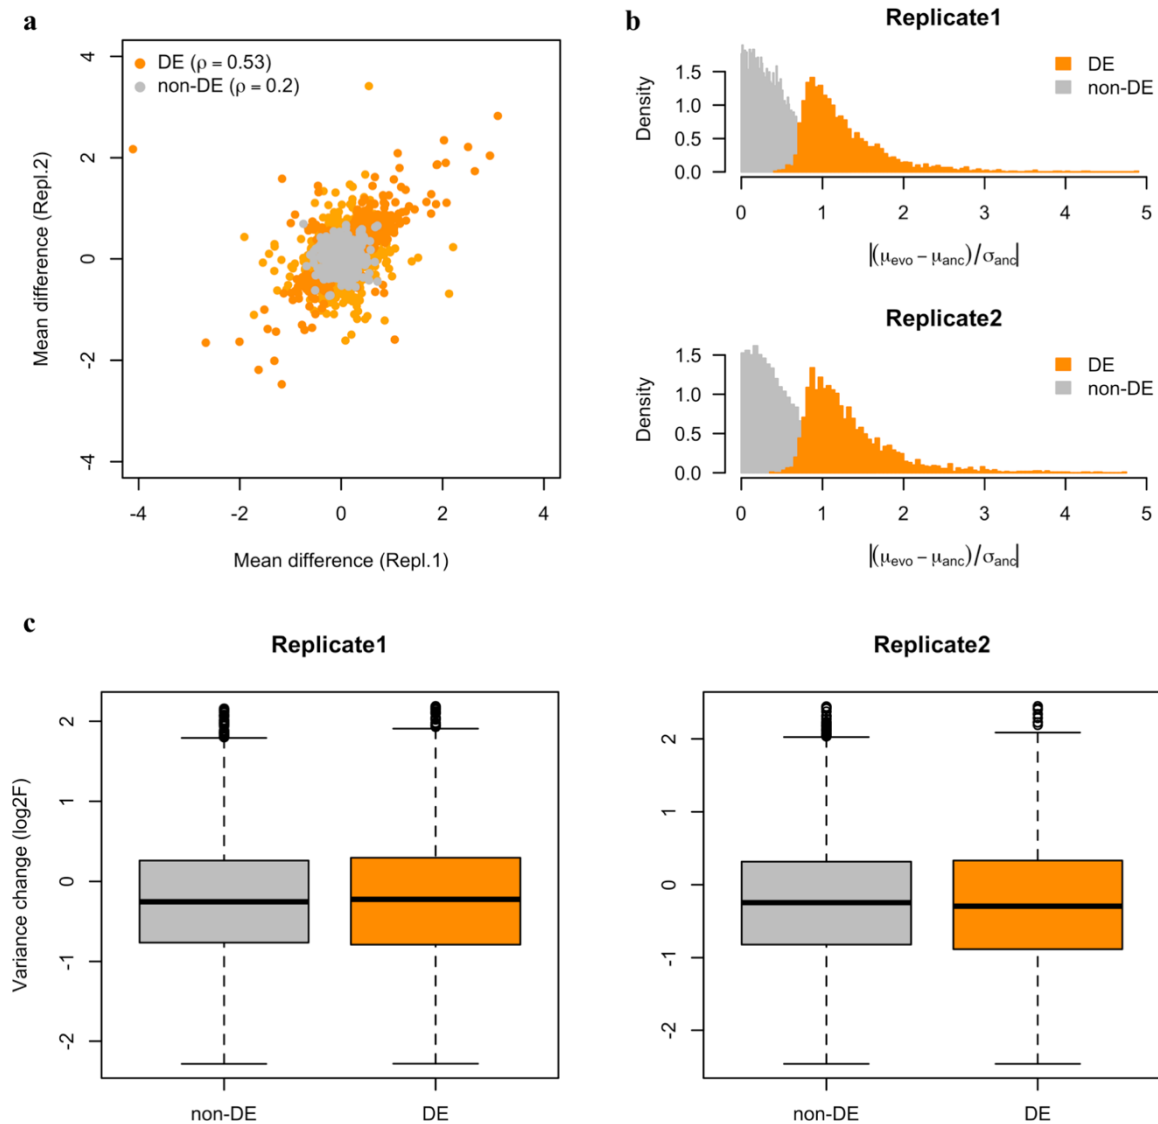

315

316 **Figure 4. Evolution of phenotypic mean and variance over 100 generations of**

317 **adaptation in empirical data. a.** The evolution of gene expression mean during adaptation

318 in the two replicates. For the genes with significant changes (DE, in orange), the changes are

319 correlated between replicates (Spearman's rho = 0.53). For the genes without significant

320 changes (non-DE, in grey), the correlation between replicates is much lower (Spearman's rho

321 = 0.2). **b.** The evolution of gene expression mean scaled by the ancestral variation. For the

322 DE genes (in orange), the median change falls around 1 standard deviation of the ancestral

323 expression value, suggesting mild shift in trait optimum in the novel environment. For the

324 non-DE genes (in grey), the changes in expression are mostly negligible. The same pattern is  
325 seen in the second replicate. **c.** The change in expression variance during adaptation for DE  
326 and non-DE genes. In both replicates, the distribution of variance changes is  
327 indistinguishable between DE genes (orange) and non-DE genes (grey) (Wilcoxon's rank  
328 sum test,  $p > 0.1$  for both replicates).  
329

## 330 **Materials and Methods**

### 331 Computer simulations

332 We performed forward simulations with MimicrEE2 (Vlachos and Kofler, 2018) using the  
333 qff mode to illustrate the influence of the genetic architecture on the evolution of phenotypic  
334 variance during the adaptation to a new trait optimum. With 189 founder haplotypes (Barghi  
335 et al., 2019), we simulated quantitative traits under the control of different numbers of loci (5,  
336 25, 50, 100, 200 and 1000) with an effective population size of 300. For each trait, we  
337 assume an additive model and a negative correlation ( $r = -0.7$ , estimated in Barghi et al.,  
338 2019) between the effect size and starting frequency (Figure 1b). The effect sizes of each  
339 locus can disperse in different levels which depend on the shape parameter of gamma  
340 sampling process (shape = 0.5, 2.5 and 100, Figure 1c). We used `correlate()` function  
341 implemented in “fabricatr” R package (Blair et al., 2019) to generate the effect sizes. The  
342 sum of effect sizes of each trait was normalized to 1. We assumed a heritability  $h^2 = 0.6$   
343 (from a family-based estimation in this study). To simulate stabilizing selection with trait  
344 optimum shift, we provided the Gaussian fitness functions with mean of  $\overline{X}_{anc.} + a\sqrt{V_{anc.}}$   
345 and standard deviation of  $b\sqrt{V_{anc.}}$ , where  $\overline{X}_{anc.}$  is the ancestral phenotypic mean and  $V_{anc.}$   
346 is the ancestral genetic variance (Figure 1a). Parameter “a” determines the distance of  
347 optimum shift, which is set to one (similar to the empirical case, Figure 4b) or three (Adopted  
348 from Sella et al., 2019). Parameter “b” indicates how strong the phenotypic constrain would  
349 be when the trait optimum is reached. The value 3.6 is adopted from Sella et al., 2019. In this  
350 study, we increase and decrease it by 50% to explore its impact (1.8 or 5.4). For the neutrality  
351 case, we assumed uniform fitness for all individuals. For each trait under each scenario, the  
352 phenotypic variance was estimated at different generations and compared to the ancestral  
353 phenotypic variance at generation 1 to illustrate the dynamic of phenotypic variance during  
354 the evolution. We note that we do not assume that the ancestral population has reached an

355 equilibrium, because the ancestral population in this study was phenotyped in the new  
356 environment.

357

### 358 Experimental evolution

359 The setup of populations and evolution experiment have been described by (Barghi et al.,  
360 2019). Briefly, ten outbred populations seeded from 202 isofemale lines were exposed to a  
361 laboratory experiment at 28/18 °C with 12hr light/12hr dark photoperiod for more than 100  
362 generations. Each replicate consisted of 1000 to 1250 adults at each generation.

363

### 364 Common garden experiment

365 The collection of samples from the evolution experiment for RNA-Seq was preceded by two  
366 generations of common garden (CGE). The common garden experiment was performed at  
367 generation 103 of the evolution in the hot environment and this CGE has been described in  
368 (Barghi et al., 2019; Hsu et al., 2020, 2019; Jakšić et al., 2020). In brief, an ancestral  
369 population was reconstituted by pooling five mated females from 184 founder isofemale lines  
370 (Nouhaud et al., 2016). No significant allele frequency differences are expected between the  
371 reconstituted ancestral populations and the original ancestral populations initiating the  
372 experiment (Nouhaud et al., 2016). Because we evaluated phenotypes on the population  
373 level, deleterious mutations will have a very limited impact. The reason is that they occur  
374 only in a single isofemale line, which represents a very small fraction of the total population.  
375 Two replicates of the reconstituted ancestral population and two independently evolved  
376 populations at generation 103 were reared for two generations with egg-density control (400  
377 eggs/bottle) at the same temperature regime as in the evolution experiment. Freshly eclosed  
378 flies were transferred onto new food for mating. Sexes were separated under CO<sub>2</sub> anesthesia  
379 at day 3 after eclosure, left to recover from CO<sub>2</sub> for two days, and at the age of five days

380 whole-body mated flies of each sex were snap-frozen at 2pm in liquid nitrogen and stored at  
381 -80°C until RNA extraction. In this study, more than 30 individual male flies from two  
382 reconstituted ancestral populations (replicate no. 27 and no. 28) and two evolved populations  
383 (replicate no. 4 and no. 9) were subjected to RNA-Seq.

384

#### 385 RNA extraction and library preparation

386 Whole bodies of individual male flies were removed from the -80°C freezer and immediately  
387 homogenized in Qiazol lysis reagent (Qiagen, Hilden, Germany). The homogenate was  
388 treated with DNase I followed by addition of chloroform, centrifugation and mixture of the  
389 upper phase with 70% ethanol as described for the Qiagen RNeasy Universal Plus Mini Kit.  
390 The mixture was subsequently loaded onto a RNeasy MinElute Spin column as provided by  
391 the RNeasy Plus Micro Kit (Qiagen, Hilden, Germany), and all washing steps were  
392 performed according to the instructions for that kit. All resulting total RNA was used to  
393 prepare stranded mRNA libraries on the Neoprep Library Prep System (Illumina, San Diego,  
394 USA) following the manufacturer's protocol: Neoprep runs were performed using software  
395 version 1.1.0.8 and protocol version 1.1.7.6 with default settings for 15 PCR cycles and an  
396 insert size of 200bp. All libraries for individuals of ancestral replicate no. 27 and evolved  
397 replicate no. 4 were prepared with library cards of lot no. 20180170; all libraries for  
398 individuals of ancestral replicate no. 28 and evolved replicate no. 9 were prepared with  
399 library cards of lot no. 20178099. 50bp single-end reads were sequenced on an Illumina  
400 HiSeq 2500. All sequencing data will be available in European Nucleotide Archive (ENA)  
401 under the accession number PRJEB37011 upon publication.

402

#### 403 RNA-Seq data processing and quality control

404 All RNA-Seq reads were trimmed using ReadTools (Gómez-Sánchez and Schlötterer, 2018)  
405 with quality score of 20 and aligned to *Drosophila simulans* reference genome (Palmieri et  
406 al., 2015) using GSNAP (Wu et al., 2016) with parameter setting -k 15 -N 1 -m 0.08.  
407 Exon-aligned reads were piped into Rsubread (Liao et al., 2019) to calculate read counts of  
408 each gene, and raw read counts of each gene were normalized with the TMM method  
409 implemented in edgeR (Robinson et al., 2010). Samples with severe 3'- bias were removed  
410 based on visual inspection of the gene-body coverage plot (Jakšić and Schlötterer, 2016;  
411 Wang et al., 2012).

412

### 413 Genetic variance in gene expression across F1 families

414 We evaluated how much of the expression variance can be explained by genetic variation by  
415 performing RNA-Seq on individual flies, with 3-4 individuals each from three isofemale lines  
416 maintained at the same density and culturing conditions.

417 Six out of 184 founder isofemale lines from the evolution experiment and were maintained  
418 for one generation with controlled egg density (400 eggs/bottle) in the same environment as  
419 the main experiment (12h 28°C with light followed by 12h 18 °C with dark conditions).

420 Using the offspring, we generated three crosses between two of the six lines each: FL 138 x  
421 FL 137, FL 157 x FL 112, FL 123 x FL 127: we combined 50 virgin females from one of the  
422 lines with 50 males from the other line, let them lay eggs under density control as above and  
423 maintained and froze their F1 offspring in the same way as in the main CGE: sexes were  
424 separated after mating at the age of three days and snap-frozen at the age of five days at 2pm.

425 From each cross, we used four F1 males to prepare individual RNA-Seq libraries as described  
426 above.



427 Assuming no environmental heterogeneity, we decomposed the total variance of the  
428 expression of each gene measured in these individuals into the genetic difference among  
429 three different F1 families and random error. The data were analyzed as follows:

430 Natural log-transformation was applied to CPMs of all genes to improve data normality  
431 (Rocke and Durbin, 2003). Principal component and principal variance component analysis  
432 (Bushel, 2019) was performed to the whole transcriptome to decompose the variance  
433 components. We found that around 60% of the gene expression variance can be explained by  
434 the genetic difference among the three F1 families (method – Figure supplement 1a and b).  
435 This implies that the within-population gene expression variance is largely contributed by the  
436 genetic components. Because we only used offspring from single vials, we may have  
437 overestimated the heritability if the environment in the vials differs. Nevertheless, since our  
438 heritability estimates are very similar to previous ones (Ayroles et al., 2009), we consider our  
439 estimates reliable.

440

441 In addition to general analysis across all genes, we also tested for the genetic variance of each  
442 gene separately using analysis of variance (ANOVA):

443 
$$y_{ij} = \mu + \tau_i + \varepsilon_{ij},$$

444 Where  $i=1, 2, 3, \dots, n$  (the  $i^{\text{th}}$  genes);  $j=1, 2, 3, 4$  (the  $j^{\text{th}}$  individuals in each cross).  $y_{ij}$  is the  
445 observed expression level of a gene in a given sample,  $\mu$  is the overall mean;  $\tau_i$  is the  
446 effect of genetic background and  $\varepsilon_{ij}$  is the random noise. We calculated the proportion of  
447 total variance explained by random error using the following equation:

448 
$$\text{variance explained by random error} = \frac{\text{sum squares of error (SSE)}}{\text{sum squares of total (SST)}}$$

449 Genes were binned based on their average expression value (lnCPM) which ranged from -0.8  
450 to 4.1, by bin size of 0.1. The average proportion of variance explained by random error of  
451 each bin was calculated.

452 The expression variance of genes with less than 1 count per million bases (CPM) is  
453 dominated by technical errors (method – Figure supplement 1c). Thus, genes with less than  
454 1 count per million base (CPM) were excluded for subsequent analysis.

455

#### 456 RNA-Seq data analysis

457 We observed some outlier individuals and suspected that the freezing process may have led  
458 to detachment of body parts, such as eyes or heads, in these individuals. We compared gene  
459 expression between such outliers and all other samples and performed tissue enrichment  
460 analysis for genes with at least 2-fold lower expression in the outlier samples. Samples with  
461 evidence of tissue detachment were excluded. After filtering, each population remained  
462 approximately 20 individuals (Supplementary file 1). Only genes with at least 1 count per  
463 million base (CPM) were included in the analyses to avoid extremely lowly expressed genes.

464 For all RNA-Seq data we only compared samples which were prepared with library cards  
465 from the same lot number to avoid batch effects (Replicate 1: evolved replicate 4 vs.  
466 reconstituted ancestral population replicate 27; Replicate 2: evolved replicate 9 vs.  
467 reconstituted ancestral population replicate 28).

468 For differential expression analysis on mean expression, we used the generalized linear  
469 modeling function implemented in edgeR (Robinson et al., 2010) to fit the expression to the  
470 model ( $Y = E + \varepsilon$ ) in which Y stands for gene expression, E is the effect of evolution and  $\varepsilon$   
471 is the random error. The likelihood ratio test was performed to test the effect of evolution.  
472 P-value adjustment was performed using the Benjamini-Hochberg false discovery rate (FDR)  
473 correction.

474 For the analysis of expression variance evolution, we applied natural log transformation  
475 (Rocke and Durbin, 2003) to eliminate the strong mean-variance dependency in RNA-Seq  
476 data due to the nature of the negative binomial distribution (method – Figure supplement 2).  
477 The variance of the expression of each gene (lnCPM) was estimated in each population. With  
478 the moderate sample size, we needed to estimate the uncertainty of variance estimates.  
479 Jackknifing was applied to measure the uncertainty of estimator (Fukunaga and Hummels,  
480 1989). The procedure was conducted independently on four replicates and we calculated the  
481 95% confidence interval of the estimated variance (method – Figure supplement 3). The  
482 change of gene expression variance was determined by the F statistics calculated as the ratio  
483 between the variance within the ancestral population and the variance within the evolved  
484 population of each gene. To test whether selection alter the expression variance, a  
485 comparison was made between the F statistics of genes with significant changes in mean  
486 expression and the ones without.  
487

488 **Acknowledgments**

489 Special thanks to David Houle, who provided fantastic support during the collection and  
490 establishment of the isofemale lines in Florida. We thank all member of the Institut für  
491 Populationsgenetik for discussion. We are grateful to Reinhard Bürger and David Houle for  
492 helpful comments on earlier versions of the manuscript. Neda Barghi, François Mallard and  
493 Kathrin Otte contributed to the common garden experiment. Illumina sequencing was  
494 performed at the VBCF NGS Unit ([www.vbcf.ac.at](http://www.vbcf.ac.at)). This work was support by the Austrian  
495 Science Funds (FWF, W1225) and the European Research Council (ERC, ArchAdapt).

496

497 **Author contribution**

498 W.Y.L and C.S. conceived the study. V.N. prepared all RNA-Seq and supervised the  
499 maintenance of the evolution experiment. A.M.J supervised the common garden experiment.  
500 W.Y.L performed the simulation and data analysis. W.Y.L. and C.S. wrote the manuscript.

501

502 **Competing interests**

503 The authors declare no competing interests.

504

505 **Correspondence and requests for materials** should be addressed to C.S.

506

507

508 **References**

- 509 Ayroles JF, Carbone MA, Stone EA, Jordan KW, Lyman RF, Magwire MM, Rollmann SM,  
510 Duncan LH, Lawrence F, Anholt RRH, Mackay TFC. 2009. Systems genetics of  
511 complex traits in *Drosophila melanogaster*. *Nat Genet* **41**:299–307. doi:10.1038/ng.332
- 512 Barghi N, Hermisson J, Schlötterer C. 2020. Polygenic adaptation: a unifying framework to  
513 understand positive selection. *Nat Rev Genet* **21**:769–781.  
514 doi:10.1038/s41576-020-0250-z
- 515 Barghi N, Tobler R, Nolte V, Jakšić AM, Mallard F, Otte KA, Dolezal M, Taus T, Kofler R,  
516 Schlötterer C. 2019. Genetic redundancy fuels polygenic adaptation in *Drosophila*.  
517 *PLOS Biol* **17**:e3000128. doi:10.1371/journal.pbio.3000128
- 518 Barton NH, Etheridge AM, Véber A. 2017. The infinitesimal model: Definition, derivation,  
519 and implications. *Theor Popul Biol* **118**:50–73. doi:10.1016/J.TPB.2017.06.001
- 520 Barton NH, Keightley PD. 2002. Understanding quantitative genetic variation. *Nat Rev Genet*  
521 **3**:11–21. doi:10.1038/nrg700
- 522 Barton NH, Turelli M. 1987. Adaptive landscapes, genetic distance and the evolution of  
523 quantitative characters. *Genet Res* **49**:157–173. doi:10.1017/S0016672300026951
- 524 Boyle EA, Li YI, Pritchard JK. 2017. An expanded view of complex traits: From polygenic  
525 to omnigenic. *Cell* **169**:1177–1186. doi:10.1016/J.CELL.2017.05.038
- 526 Bulmer MG. 1972. The genetic variability of polygenic characters under optimizing  
527 selection, mutation and drift. *Genet Res* **19**:17–25. doi:10.1017/S0016672300014221
- 528 Burke MK, Dunham JP, Shahrestani P, Thornton KR, Rose MR, Long AD. 2010.  
529 Genome-wide analysis of a long-term evolution experiment with *Drosophila*. *Nature*  
530 **467**:587–590. doi:10.1038/nature09352
- 531 Bushel P. 2019. pvca: Principal variance component analysis (PVCA). *R Packag version*

- 532       1240.
- 533   Castle WE. 1921. An improved method of estimating the number of genetic factors  
534       concerned in the cases of blending inheritance. *Science* **54**:223.  
535       doi:10.1126/science.54.1393.223
- 536   Chevalet C. 1994. An approximate theory of selection assuming a finite number of  
537       quantitative trait loci. *Genet Sel Evol.* **26**:379. doi:10.1186/1297-9686-26-5-379
- 538   Chippindale AK, Chu TJF, Rose MR. 1996. Complex trade-offs and the evolution of  
539       starvation resistance in *Drosophila melanogaster*. *Evolution (N Y)* **50**:753–766.  
540       doi:10.1111/j.1558-5646.1996.tb03885.x
- 541   Clutton-Brock TH, Pemberton JM (Josephine M). 2004. Soay sheep : population dynamics  
542       and selection on St. Kilda. Cambridge University Press.
- 543   Daborn PJ, Yen JL, Bogwitz MR, Le Goff G, Feil E, Jeffers S, Tijet N, Perry T, Heckel D,  
544       Batterham P, Feyereisen R, Wilson TG, ffrench-Constant RH. 2002. A single p450  
545       allele associated with insecticide resistance in *Drosophila*. *Science* **297**:2253–6.  
546       doi:10.1126/science.1074170
- 547   Endler L, Gibert J-M, Nolte V, Schlötterer C. 2018. Pleiotropic effects of regulatory variation  
548       in *tan* result in correlation of two pigmentation traits in *Drosophila melanogaster*. *Mol*  
549       *Ecol* **27**:3207–3218. doi:10.1111/mec.14781
- 550   Falconer DS, Mackay TFC. 1963. Introduction to quantitative genetics, Poultry Science.  
551       CreateSpace Independent Publishing Platform. doi:10.3382/ps.0420547
- 552   Ferea TL, Botstein D, Brown PO, Rosenzweig RF. 1999. Systematic changes in gene  
553       expression patterns following adaptive evolution in yeast. *Proc Natl Acad Sci U S A*  
554       **96**:9721–6. doi:10.1073/pnas.96.17.9721
- 555   Franssen SU, Kofler R, Schlötterer C. 2017. Uncovering the genetic signature of quantitative  
556       trait evolution with replicated time series data. *Heredity (Edinb)* **118**:42–51.

- 557       doi:10.1038/hdy.2016.98
- 558   Fukunaga K, Hummels DM. 1989. Leave-one-out procedures for nonparametric error  
559       estimates. *IEEE Trans Pattern Anal Mach Intell* **11**:421–423. doi:10.1109/34.19039
- 560   Gómez-Sánchez D, Schlötterer C. 2018. *ReadTools*: A universal toolkit for handling  
561       sequence data from different sequencing platforms. *Mol Ecol Resour* **18**:676–680.  
562       doi:10.1111/1755-0998.12741
- 563   Hayward LK, Sella G. 2019. Polygenic adaptation after a sudden change in environment.  
564       *bioRxiv* 792952. doi:10.1101/792952
- 565   Hsu S-K, Jakšić AM, Nolte V, Barghi N, Mallard F, Otte KA, Schlötterer C, Hsu S-K, Jakšić  
566       AM, Nolte V, Barghi N, Mallard F, Otte KA, Schlötterer C. 2019. A 24 h age difference  
567       causes twice as much gene expression divergence as 100 generations of adaptation to a  
568       novel environment. *Genes (Basel)* **10**:89. doi:10.3390/genes10020089
- 569   Hsu S-K, Jakšić AM, Nolte V, Lirakis M, Kofler R, Barghi N, Versace E, Schlötterer C.  
570       2020. Rapid sex-specific adaptation to high temperature in *Drosophila*. *Elife* **9**.  
571       doi:10.7554/eLife.53237
- 572   Huang W, Carbone MA, Magwire MM, Peiffer JA, Lyman RF, Stone EA, Anholt RRH,  
573       Mackay TFC. 2015. Genetic basis of transcriptome diversity in *Drosophila*  
574       *melanogaster*. *Proc Natl Acad Sci U S A* **112**:E6010–E6019.  
575       doi:10.1073/pnas.1519159112
- 576   Huang Y, Agrawal AF. 2016. Experimental evolution of gene expression and plasticity in  
577       alternative selective regimes. *PLOS Genet* **12**:e1006336.  
578       doi:10.1371/journal.pgen.1006336
- 579   Jain K, Stephan W. 2015. Response of polygenic traits under stabilizing selection and  
580       mutation when loci have unequal effects. *G3 (Bethesda)* **5**:1065–74.  
581       doi:10.1534/g3.115.017970

- 582 Jakšić AM, Karner J, Nolte V, Hsu S-K, Barghi N, Mallard F, Otte KA, Svečnjak L, Senti  
583 K-A, Schlötterer C. 2020. Neuronal function and dopamine signaling evolve at high  
584 temperature in *Drosophila*. *Mol Biol Evol* **37**:2630–2640. doi:10.1093/molbev/msaa116
- 585 Jakšić AM, Schlötterer C. 2016. The interplay of temperature and genotype on patterns of  
586 alternative splicing in *Drosophila melanogaster*. *Genetics* **204**:315–325.  
587 doi:10.1534/GENETICS.116.192310
- 588 Kawecki TJ, Lenski RE, Ebert D, Hollis B, Olivieri I, Whitlock MC. 2012. Experimental  
589 evolution. *Trends Ecol Evol* **27**:547–560. doi:10.1016/J.TREE.2012.06.001
- 590 Keightley PD, Hill WG. 1989. Quantitative genetic variability maintained by  
591 mutation-stabilizing selection balance: sampling variation and response to subsequent  
592 directional selection. *Genet Res* **54**:45–58. doi:10.1017/S0016672300028366
- 593 Kimura M, Crow JF. 1964. The number of alleles that can be maintained in a finite  
594 population. *Genetics* **49**:725–738.
- 595 Lai W.-Y. & Schlötterer, C. 2021. Evolution of gene expression variance during adaptation to  
596 high temperature in *Drosophila*. *BioRxiv*.
- 597 Lande R. 1976. Natural selection and random genetic drift in phenotypic evolution. *Evolution*  
598 (*N Y*) **30**:314–334. doi:10.1111/j.1558-5646.1976.tb00911.x
- 599 Lenski RE, Travisano M, Larison B, Moritz C. 1994. Dynamics of adaptation and  
600 diversification: a 10,000-generation experiment with bacterial populations. *Proc Natl*  
601 *Acad Sci* **91**:6808–6814. doi:10.1073/pnas.91.15.6808
- 602 Liao Y, Smyth GK, Shi W. 2019. The R package Rsubread is easier, faster, cheaper and  
603 better for alignment and quantification of RNA sequencing reads. *Nucleic Acids Res*  
604 **47**:e47–e47. doi:10.1093/nar/gkz114
- 605 Liu X, Li YI, Pritchard JK. 2019. Trans effects on gene expression can drive omnigenic  
606 inheritance. *Cell* **177**:1022-1034.e6. doi:10.1016/J.CELL.2019.04.014



- 607 Mackay TFC, Stone EA, Ayroles JF. 2009. The genetics of quantitative traits: challenges and  
608 prospects. *Nat Rev Genet* **10**:565–577. doi:10.1038/nrg2612
- 609 Mallard F, Nolte V, Tobler R, Kapun M, Schlötterer C. 2018. A simple genetic basis of  
610 adaptation to a novel thermal environment results in complex metabolic rewiring in  
611 *Drosophila*. *Genome Biol* **19**:119. doi:10.1186/s13059-018-1503-4
- 612 Nielsen R. 2005. Molecular signatures of natural selection. *Annu Rev Genet* **39**:197–218.  
613 doi:10.1146/annurev.genet.39.073003.112420
- 614 Nouhaud P, Tobler R, Nolte V, Schlötterer C. 2016. Ancestral population reconstitution from  
615 isofemale lines as a tool for experimental evolution. *Ecol Evol* **6**:7169–7175.  
616 doi:10.1002/ece3.2402
- 617 Otte KA, Nolte V, Mallard F, Schlötterer C. 2020. The adaptive architecture is shaped by  
618 population ancestry and not by selection regime. *bioRxiv* 2020.06.25.170878.  
619 doi:10.1101/2020.06.25.170878
- 620 Palmieri N, Nolte V, Chen J, Schlötterer C. 2015. Genome assembly and annotation of a  
621 *Drosophila simulans* strain from Madagascar. *Mol Ecol Resour* **15**:372–81.  
622 doi:10.1111/1755-0998.12297
- 623 Pélabon C, Hansen TF, Carter AJR, Houle D. 2010. Evolution of variation and variability  
624 under fluctuating, stabilizing, and disruptive selection. *Evolution (N Y)* **64**:1912–25.  
625 doi:10.1111/j.1558-5646.2010.00979.x
- 626 Pritchard JK, Pickrell JK, Coop G. 2010. The genetics of human adaptation: Hard sweeps,  
627 soft sweeps, and polygenic adaptation. *Curr Biol* **20**:R208–R215.  
628 doi:10.1016/J.CUB.2009.11.055
- 629 Robinson MD, McCarthy DJ, Smyth GK. 2010. edgeR: a Bioconductor package for  
630 differential expression analysis of digital gene expression data. *Bioinformatics* **26**:139–  
631 140. doi:10.1093/bioinformatics/btp616

- 632    Rocke DM, Durbin B. 2003. Approximate variance-stabilizing transformations for  
633    gene-expression microarray data. *Bioinformatics* **19**:966–72.
- 634    Romero IG, Ruvinsky I, Gilad Y. 2012. Comparative studies of gene expression and the  
635    evolution of gene regulation. *Nat Rev Genet* **13**:505–516. doi:10.1038/nrg3229
- 636    Signor SA, Nuzhdin S V. 2018. The evolution of gene expression in *cis* and *trans*. *Trends*  
637    *Genet* **34**:532–544. doi:10.1016/j.tig.2018.03.007
- 638    Sork VL. 2017. Genomic studies of local adaptation in natural plant populations. *J Hered*  
639    **109**:3–15. doi:10.1093/jhered/esx091
- 640    Suvorov A, Nolte V, Pandey RV, Franssen SU, Futschik A, Schlötterer C. 2013.  
641    Intra-specific regulatory variation in *Drosophila pseudoobscura*. *PLoS One* **8**:e83547.  
642    doi:10.1371/journal.pone.0083547
- 643    Turelli M. 1984. Heritable genetic variation via mutation-selection balance: Lerch’s zeta  
644    meets the abdominal bristle. *Theor Popul Biol* **25**:138–193.  
645    doi:10.1016/0040-5809(84)90017-0
- 646    Wang L, Wang S, Li W. 2012. RSeQC: quality control of RNA-seq experiments.  
647    *Bioinformatics* **28**:2184–2185. doi:10.1093/bioinformatics/bts356
- 648    Wittkopp PJ, Haerum BK, Clark AG. 2008. Regulatory changes underlying expression  
649    differences within and between *Drosophila* species. *Nat Genet* **40**:346–350.  
650    doi:10.1038/ng.77
- 651    Wittkopp PJ, Haerum BK, Clark AG. 2004. Evolutionary changes in *cis* and *trans* gene  
652    regulation. *Nature* **430**:85–88. doi:10.1038/nature02698
- 653    Wu TD, Reeder J, Lawrence M, Becker G, Brauer MJ. 2016. GMAP and GSNAP for  
654    genomic sequence alignment: Enhancements to speed, accuracy, and functionality.  
655    Humana Press, New York, NY. pp. 283–334. doi:10.1007/978-1-4939-3578-9\_15
- 656    Yoo BH, Nicholas FW, Rathie KA. 1980. Long-term selection for a quantitative character in

657 large replicate populations of *Drosophila melanogaster*. *Theor Appl Genet* **57**:113–117.

658 doi:10.1007/BF00253881

659

660 **Figure supplements**

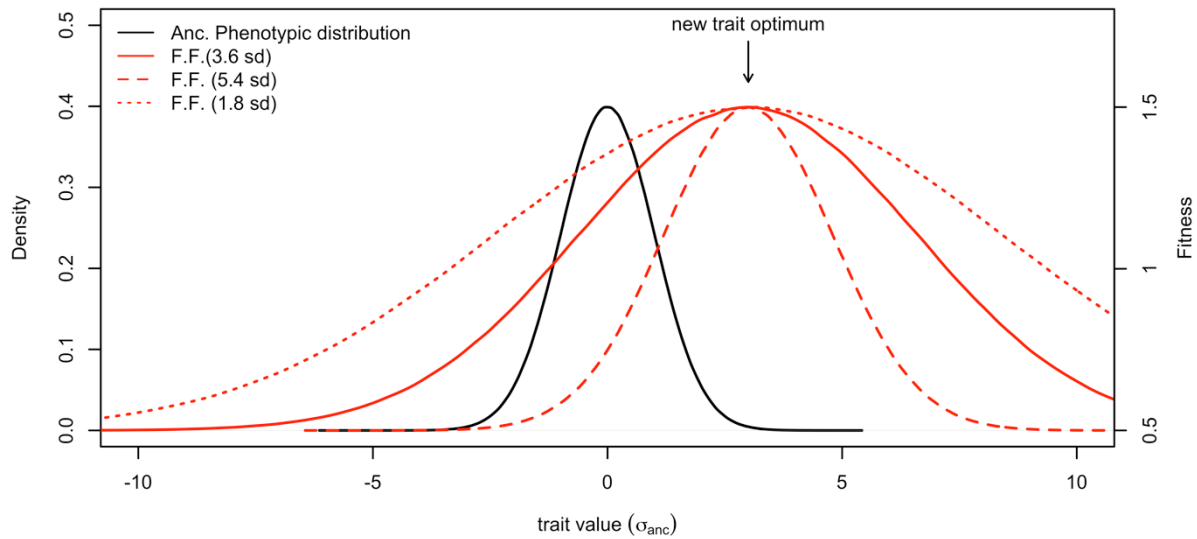

661

662 **Figure 1 – Figure supplement 1. The evolutionary scenario for distant optimum shift.**

663 We consider the case when a quantitative trait (in black) experiences a sudden shift in trait  
664 optimum under stabilizing selection. The imposed fitness functions (F.F.) are illustrated in  
665 red. The new trait optimum is set away from the ancestral trait mean by three standard  
666 deviation of the ancestral trait distribution for distal shift. To vary the strength of stabilizing  
667 selection, the variance of the fitness function is set as 1.8, 3.6 and 5.4 standard deviation of  
668 the ancestral trait distribution.

669

670

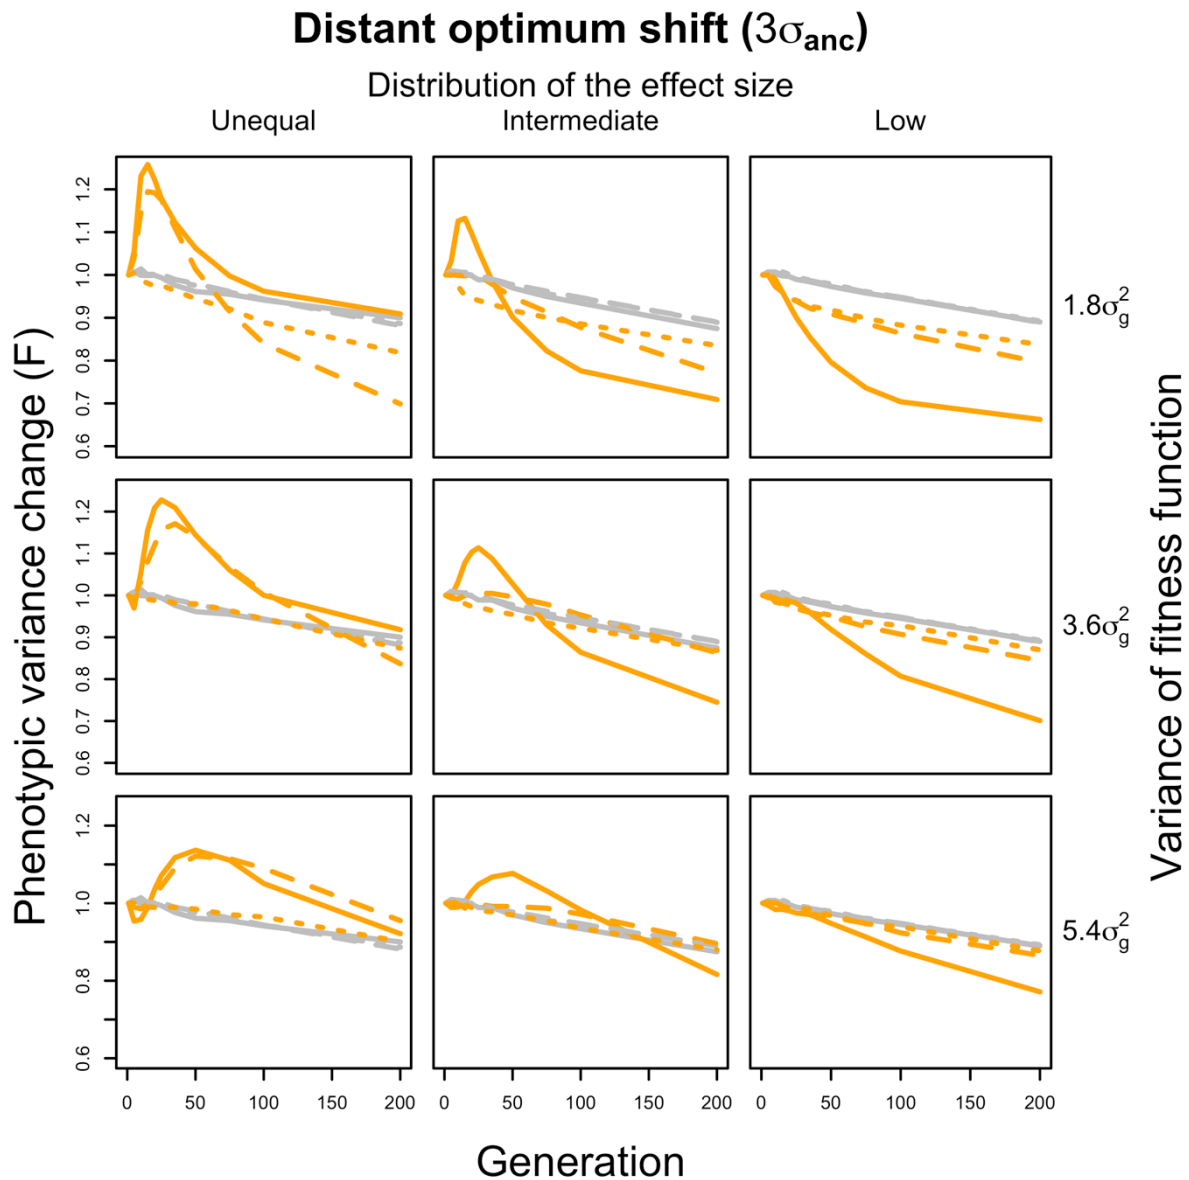

671

672 **Figure 2 – Figure supplement 1. The trajectory of expected changes in phenotypic**  
 673 **variance when adapting to a distant optimum shift.** The changes in phenotypic variance  
 674 within 200 generations adapting to a distant optimum shift (orange) are compared to the  
 675 changes under neutrality (grey) on y axis. The change in variance (F) is calculated as the ratio  
 676 of phenotypic variance between each evolved time point (generation x) and the ancestral state  
 677 ( $\sigma_{200}^2/\sigma_0^2$ ). The simulations cover traits controlled by varying numbers of loci underlying the  
 678 adaptation with three different distributions of effect sizes (columns) and under different

679 strength of stabilizing selection (rows). For each scenario, 1000 runs of simulations have  
680 been performed. Only traits with the most (dotted lines, 1000 loci), intermediate (dash lines,  
681 50 loci) and the least (solid lines, 5 loci) polygenic architectures are shown. Unlike the  
682 continuous decreasing pattern in the cases with moderate optimum shifts, the variance of  
683 traits controlled by a few loci (5 loci) with largely dispersed effects would increase first and  
684 then decrease when the effect sizes of contributing loci are dispersed (orange solid lines).  
685 Nevertheless, for traits with extremely polygenic basis, the phenotypic variance always stays  
686 stable over time (orange dotted lines).  
687

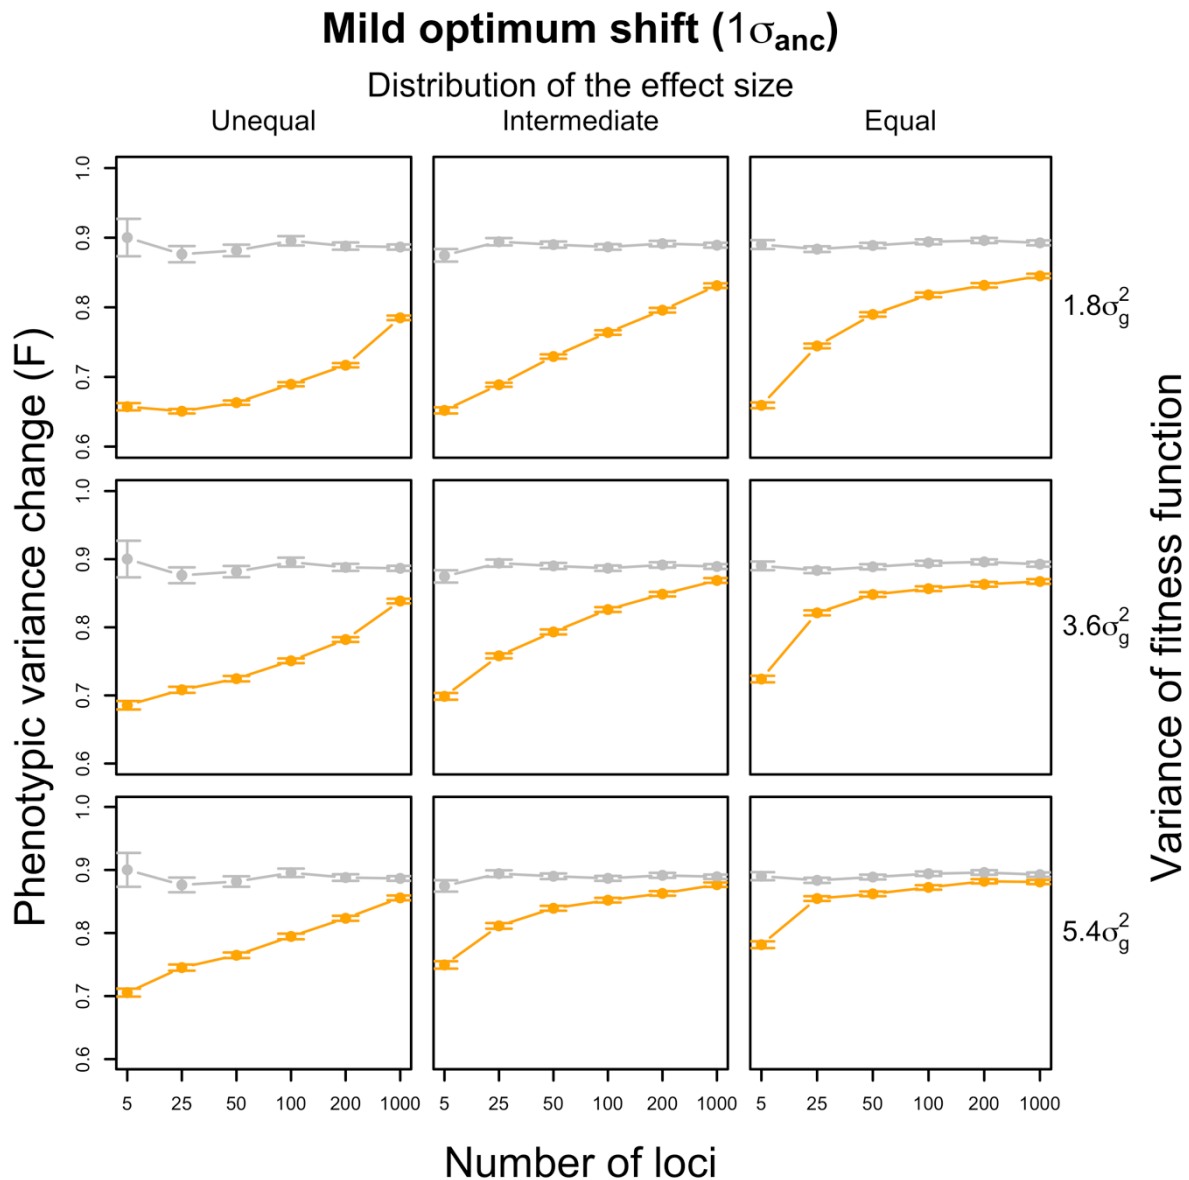

688

689 **Figure 2 – Figure supplement 2. The expected changes in phenotypic variance and the**  
 690 **number of contributing loci.** The changes in phenotypic variance after 200 generations  
 691 adapting to a mild optimum shift (orange) are compared to the changes under neutrality (grey)  
 692 on y axis. The change in variance (F) is calculated as the ratio between the evolved and  
 693 ancestral phenotypic variance ( $\sigma_{200}^2/\sigma_0^2$ ). The simulations cover traits controlled by varying  
 694 numbers of loci underlying the adaptation (x-axes) with three different distributions of effect  
 695 sizes (columns) and under different strength of stabilizing selection (rows). For each scenario,  
 696 1000 runs of simulations have been performed. In all scenarios, the variance of the trait

697 decreases drastically when the adaptation is controlled by a small number of loci. As the

698 number of contributing loci increases, the phenotypic variance becomes more stable.

699



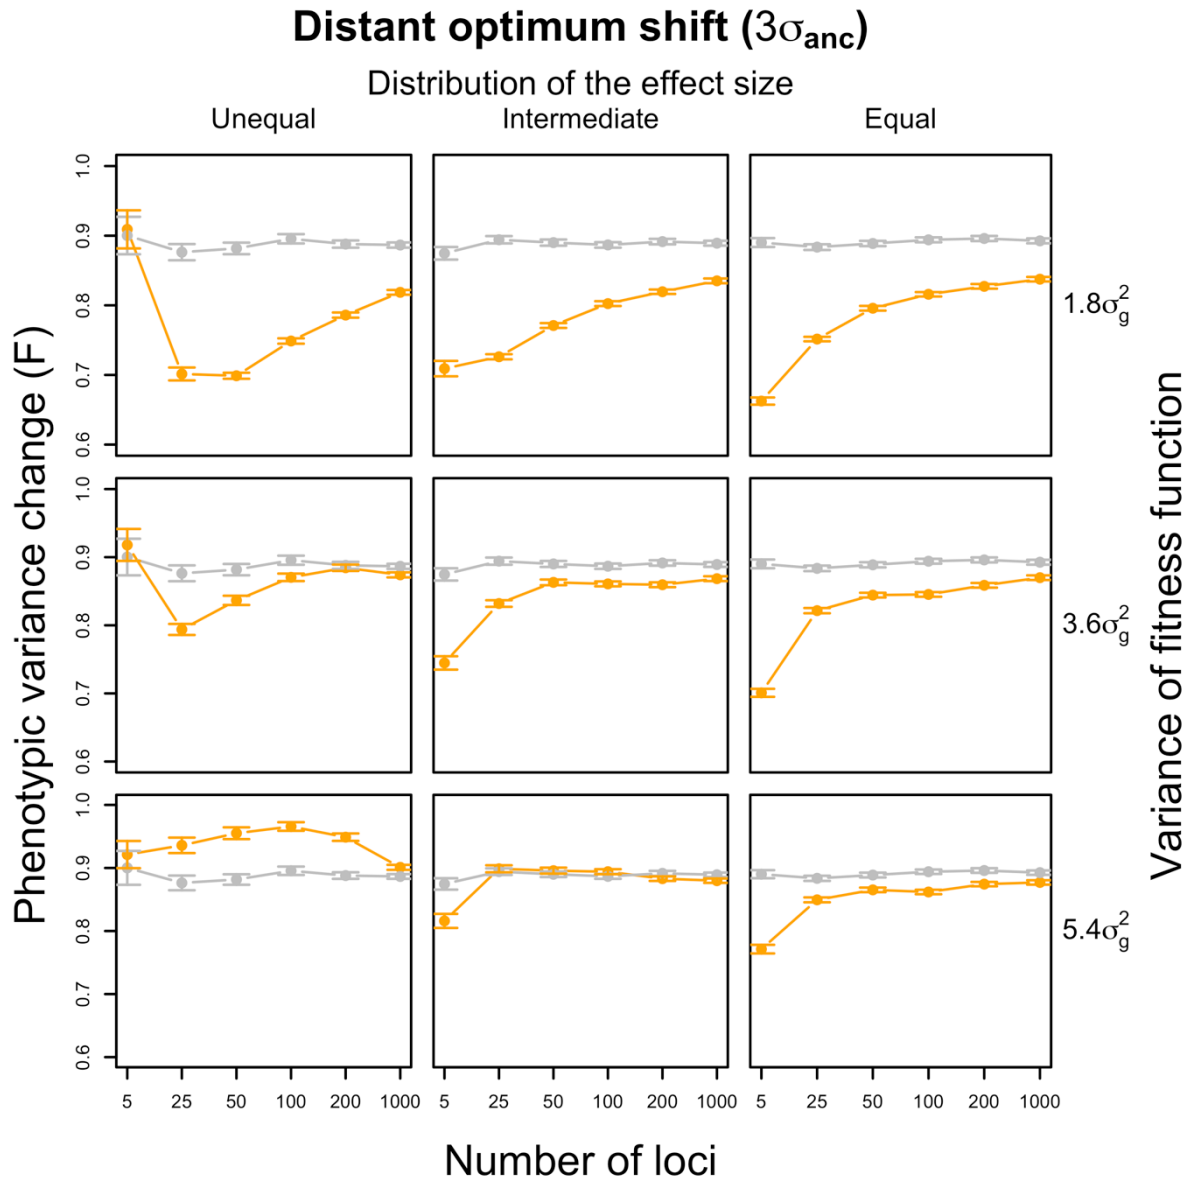

700

701 **Figure 2 – Figure supplement 3. The expected changes in phenotypic variance and the**

702 **number of contributing loci.** The changes in phenotypic variance after 200 generations

703 adapting to a distant optimum shift (orange) are compared to the changes under neutrality

704 (grey) on y axis. The change in variance (F) is calculated as the ratio between the evolved

705 and ancestral phenotypic variance ( $\sigma_{200}^2/\sigma_0^2$ ). The simulations cover traits controlled by

706 varying numbers of loci underlying the adaptation (x-axes) with three different distributions

707 of effect sizes (columns) and under different strength of stabilizing selection (rows). For each

708 scenario, 1000 runs of simulations have been performed. In most scenarios, the variance of

709 the trait decreases drastically when the adaptation is controlled by a small number of loci. As  
710 the number of contributing loci increases, the phenotypic variance becomes more stable.  
711 However, exceptions can be observed when the effect sizes of the contributing loci are  
712 largely dispersed. In these cases, shift in optimum does not have the strong impact on the  
713 variance of traits under simple genetic control (5 contributing loci). In the extreme case,  
714 highly dispersed effect sizes in combination with a relaxed phenotypic constraint removes the  
715 relationship between the number of loci and the changes in phenotypic variance.  
716

717

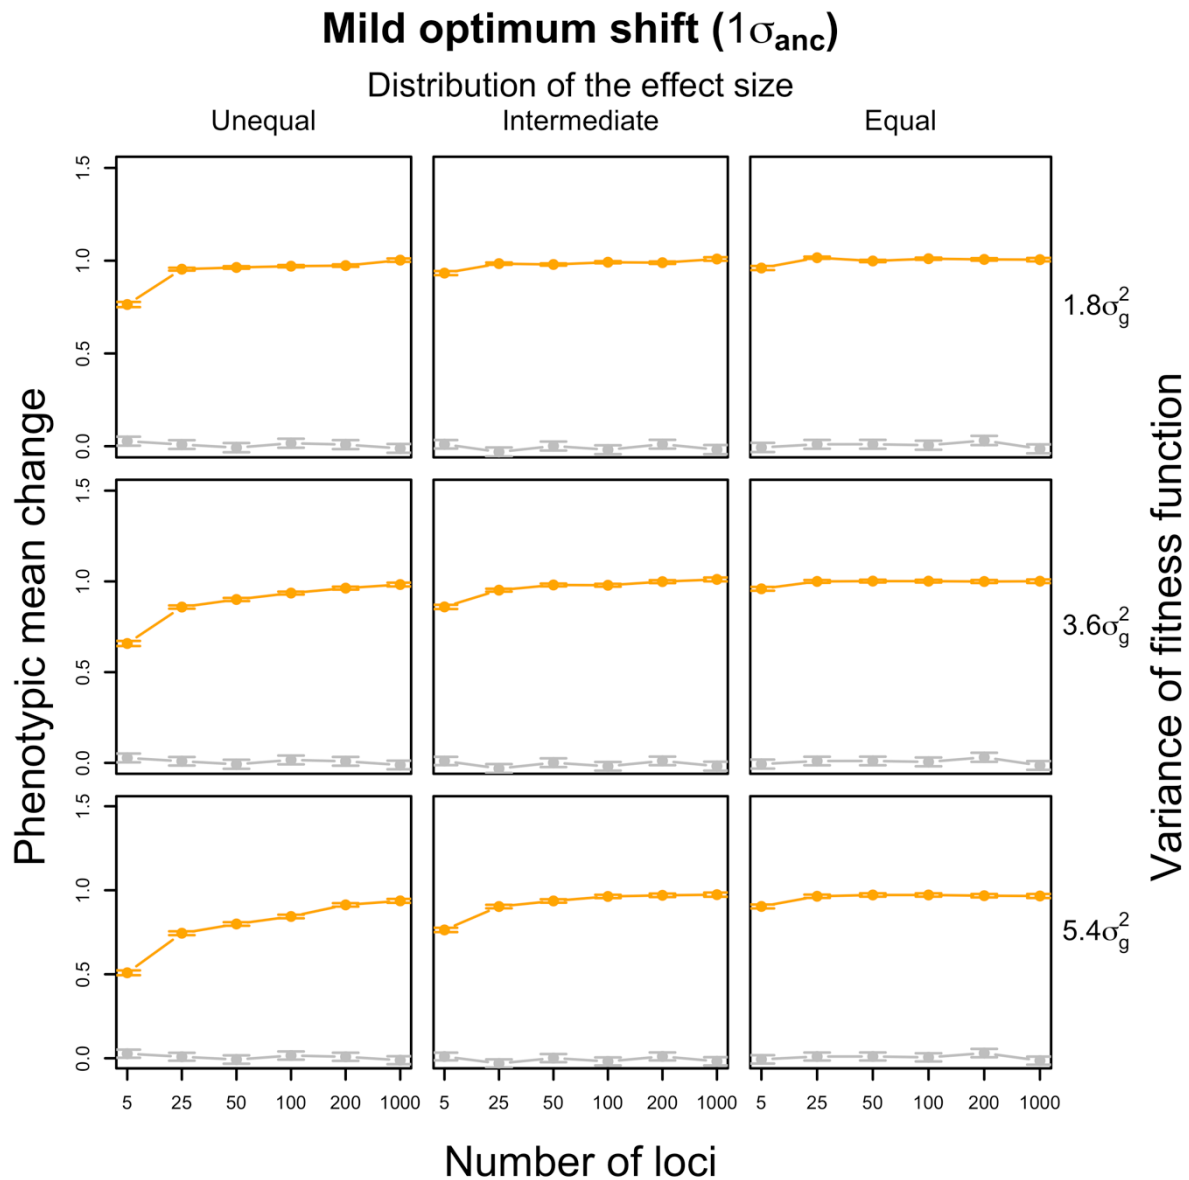

718

719 **Figure 2 – Figure supplement 4. The changes in phenotypic mean when adapting to a**  
720 **mild optimum shift.** The changes in phenotypic mean after 200 generations adapting to a  
721 mild optimum shift (orange) are compared to the changes under neutrality (grey) on y axis.  
722 The changes in phenotypic mean are scaled by the standard deviation of the ancestral trait  
723 distribution. The simulations cover traits controlled by varying numbers of loci underlying  
724 the adaptation (x axes) with three different distributions of effect sizes (columns) and under  
725 different strength of stabilizing selection (rows). For each scenario, 1000 runs of simulations

726 have been performed. In most cases, the traits under selection (orange) shift their means by  
727 one standard deviation of the ancestral trait distribution (i.e. reaching the new trait optimum)  
728 while the neutral traits (grey) stay unchanged.  
729

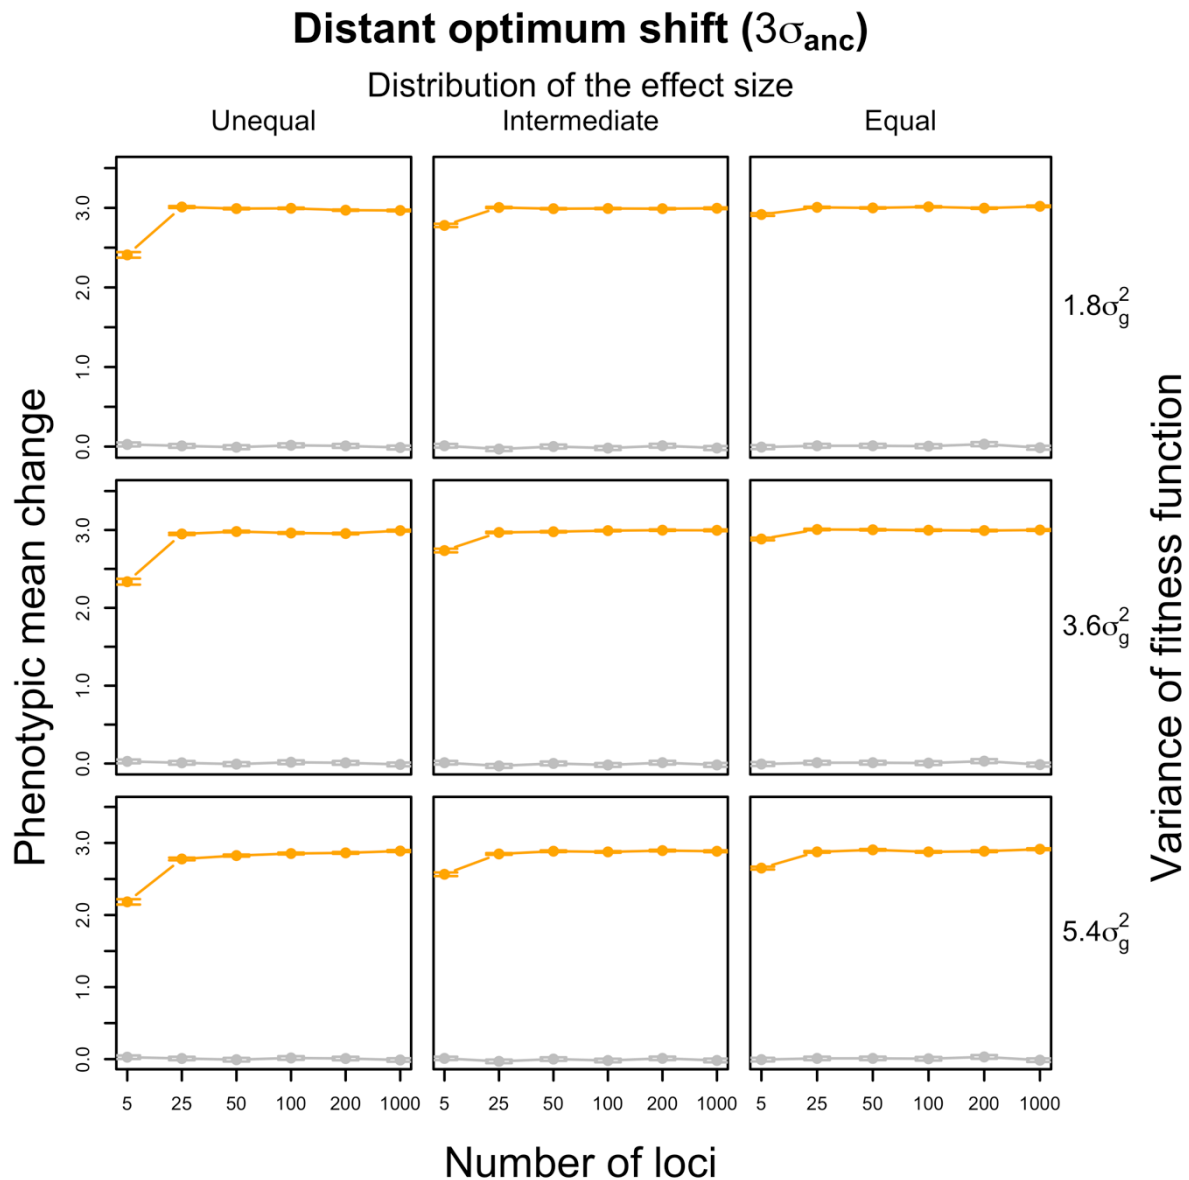

730

731 **Figure 2 – Figure supplement 5. The changes in phenotypic mean when adapting to a**

732 **distant optimum shift.** The changes in phenotypic mean after 200 generations adapting to a

733 distant optimum shift (orange) are compared to the changes under neutrality (grey) on y axis.

734 The changes in phenotypic mean are scaled by the standard deviation of the ancestral trait

735 distribution. The simulations cover traits controlled by varying numbers of loci underlying

736 the adaptation (x axes) with three different distributions of effect sizes (columns) and under

737 different strength of stabilizing selection (rows). For each scenario, 1000 runs of simulations

738 have been performed. In most cases, the traits under selection (orange) shift their means by

739 three standard deviation of the ancestral trait distribution (i.e. reaching the new trait optimum)

740 while the neutral traits (grey) stay unchanged.

741

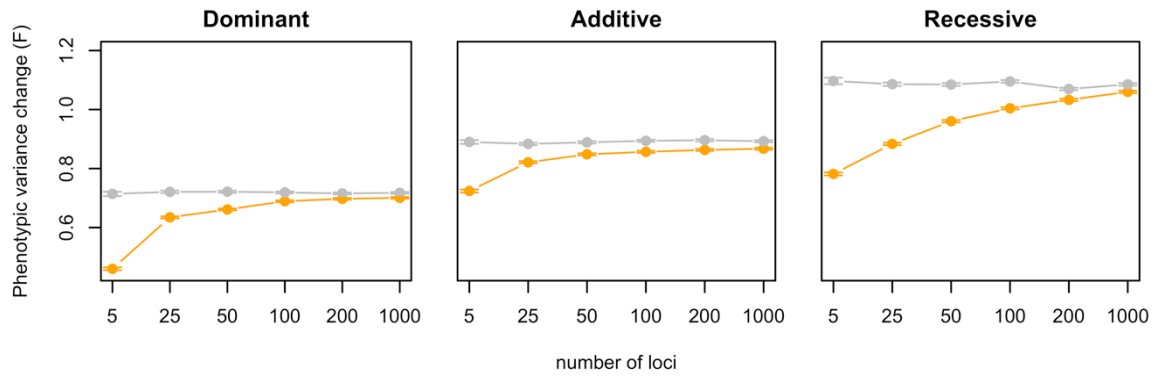

742

743 **Figure 2 – Figure supplement 6. The expected changes in phenotypic variance for traits**

744 **controlled by dominant and recessive alleles.** The changes in phenotypic variance after 200

745 generations adapting to a mild optimum shift (orange) are compared to the changes under

746 neutrality (grey) on y axis. The change in variance (F) is calculated as the ratio between the

747 evolved and ancestral phenotypic variance ( $\sigma_{200}^2/\sigma_0^2$ ). This simulation covers traits controlled

748 by varying numbers of loci underlying the adaptation (x axes) with recessive, additive and

749 dominant effects. For each scenario, 1000 runs of simulations have been performed. No

750 matter how the dominance varies, the variance of the trait decreases drastically when the

751 adaptation is controlled by a small number of loci. As the number of contributing loci

752 increases, the phenotypic variance becomes more stable.

753

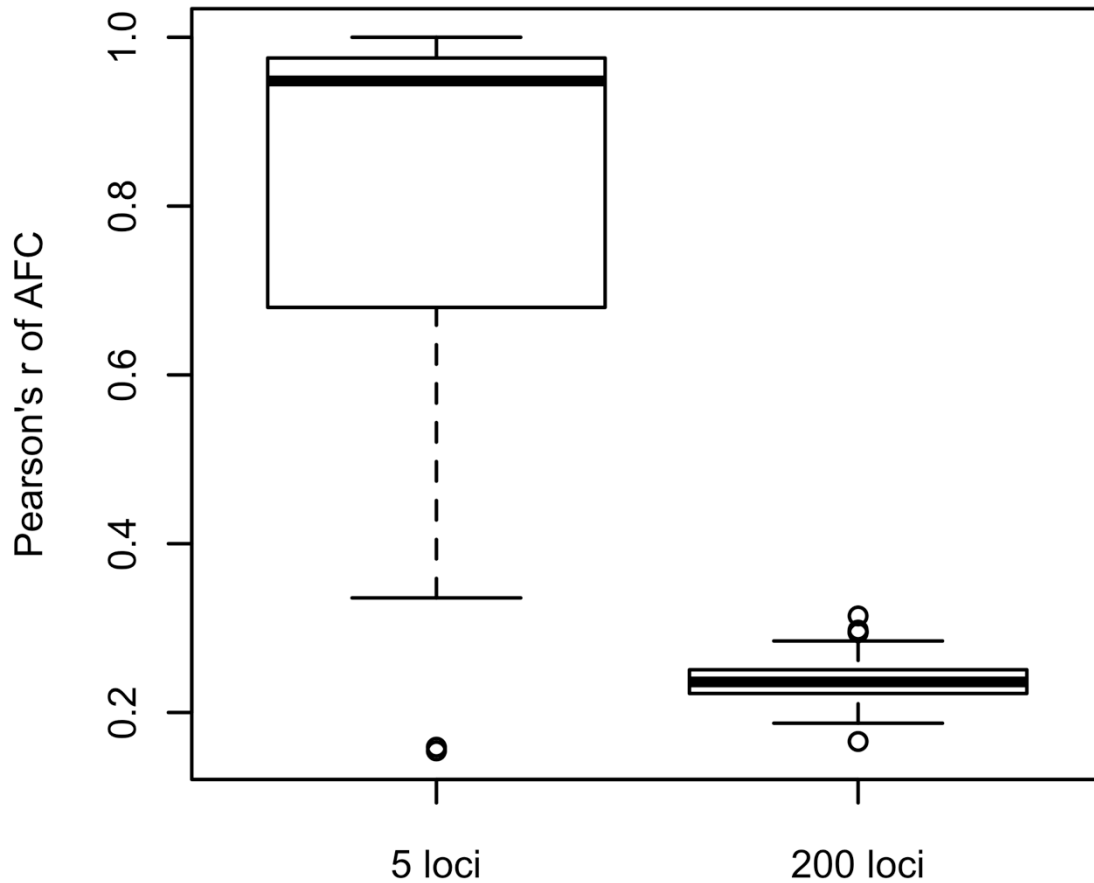

754

755 **Figure 2 – Figure supplement 7. Parallelism in genomic response across 10 evolved**

756 **replicates for traits under the control of five loci and 100 loci.** For the loci with allele

757 frequency change of at least 10% in 200 generations, the average Pearson's correlation

758 coefficient of the frequency change between all pairs of two evolved replicates was

759 calculated to describe the parallelism of the evolution at these loci. An average across loci is

760 used to obtain a general parallelism. 100 runs of simulations with 10 evolution replicates

761 have been performed for each scenario. With five contributing loci, the genomic evolution of



762 the contributing loci is more parallel across the 10 evolved replicates compared to the case

763 when with 100 contributing loci.

764

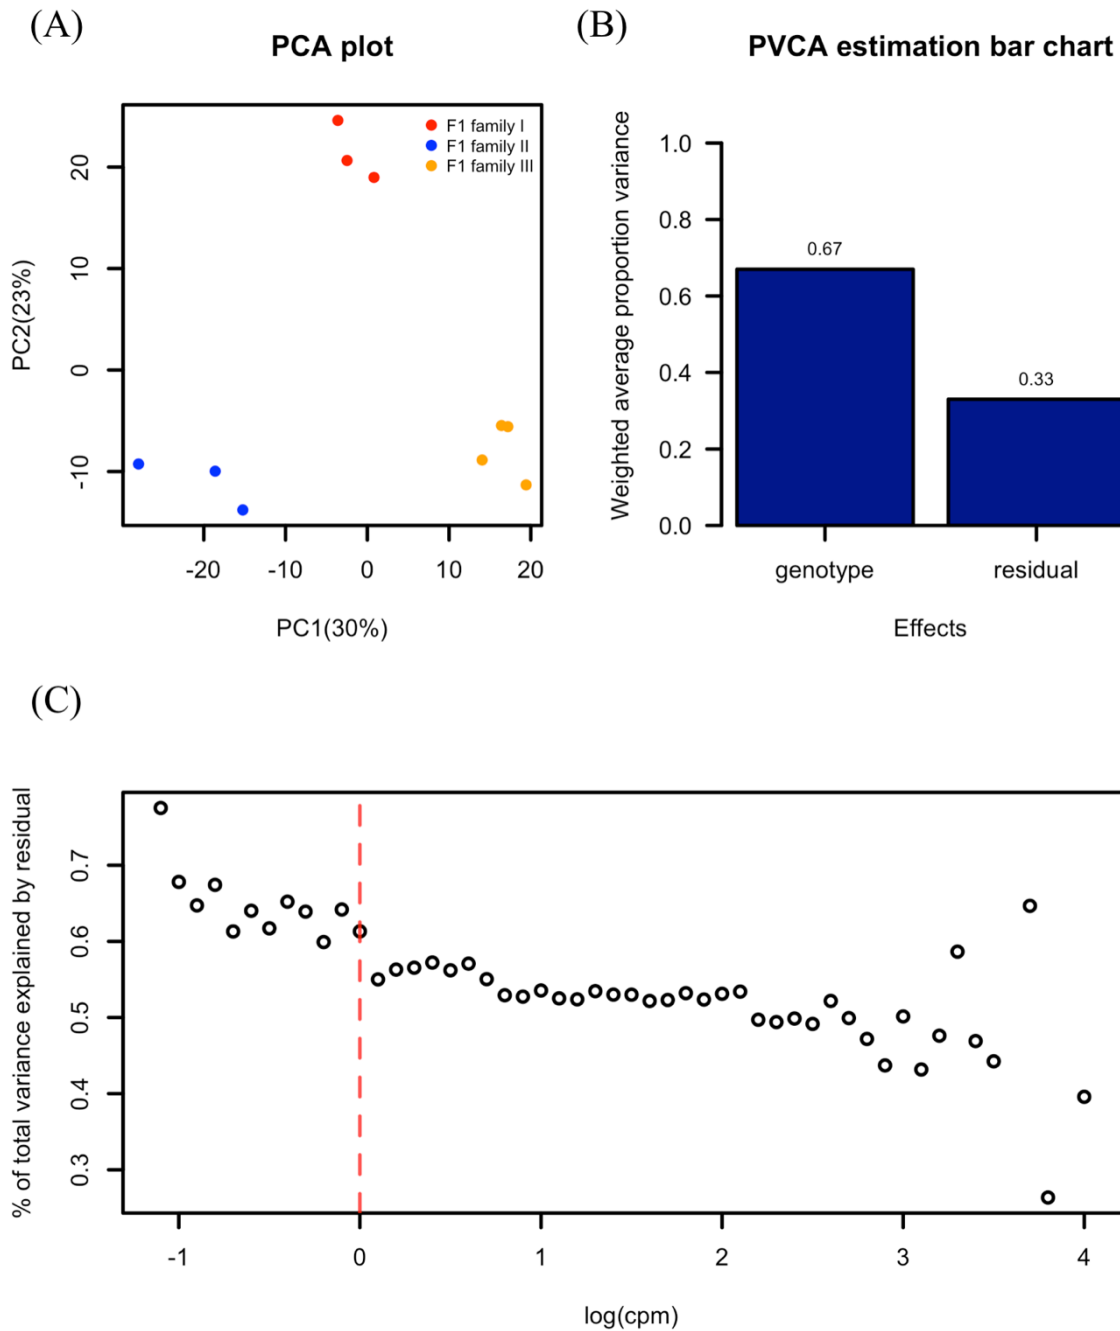

765

766 **Method – Figure supplement 1. Genetic variance in gene expression across F1 families.**

767 (A) Principal component analysis (PCA) on the transcriptomes of F1 individuals from three

768 different crosses between the founder iso-female lines. Individuals from different families

769 clustered nicely based on the first two PCs. (B) Principal variance component analysis

770 (PVCA) on the transcriptomes of F1 individuals. 67% of the total variance in gene expression

771 was explained by the genetic difference between the individuals. (C) Gene-wise analysis of

772 variance (ANOVA) in gene expression. Genes were binned based on their average expression  
773 value (lnCPM) which ranged from -0.8 to 4.1, by bin size of 0.1. The average proportion of  
774 variance explained by random error of each bin was visualized. The expression variance of  
775 genes with less than 1 count per million bases (CPM) is dominated by residuals.  
776

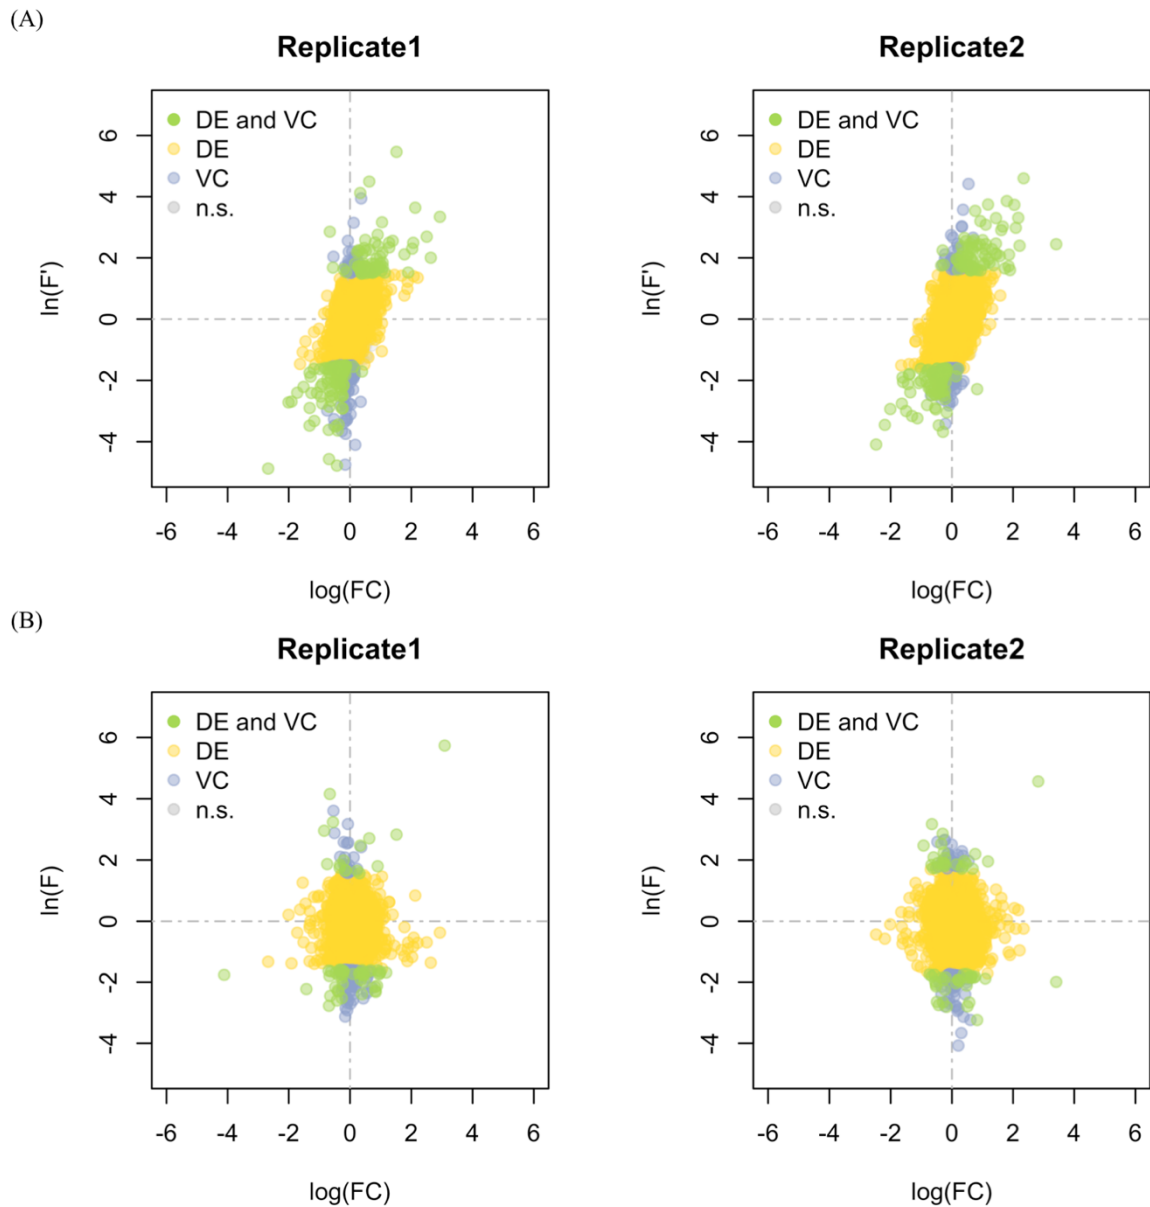

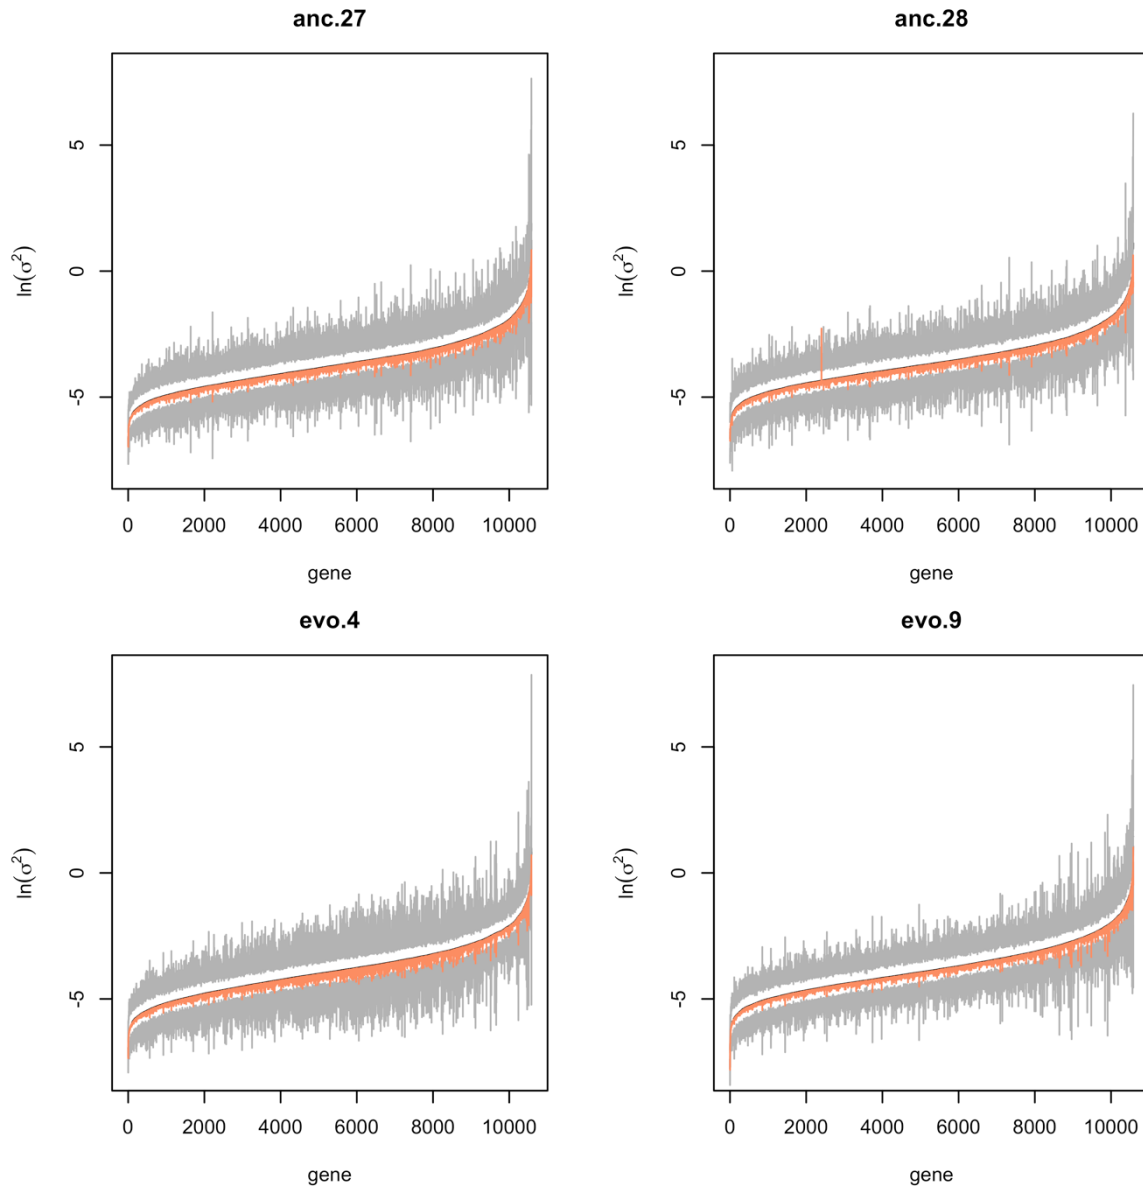

786

787 **Method – Figure supplement 3. Robustness of the variance estimation using individual**

788 **sequencing data.** Jackknife method was applied to measure the uncertainty of variance

789 estimation. Given a sample size of  $K$ , the procedure is to estimate the variance of each gene

790 for  $K$  times, each time leaving one sample out. The procedure was conducted independently

791 on 4 populations (anc.27, anc.28, evo.4 and evo.9). In each panel, we visualize Jackknife

792 approximated 95% confidence interval for the variance estimates of each gene. The genes are

793 ordered based on the average variance estimates (black dash line) on the x-axis. The upper

794 and lower limits of the 95% confidence interval are indicated with grey curves. The salmon

795 line denotes the observed value of the variance estimates. In most cases, the estimates lie in  
796 the confidence interval, suggesting robust estimation.

797

798 **Titles and legend for supplementary files**

799 **Supplementary file 1. Library information of the sample in this study.** This file provides  
800 a list of all sequenced samples and the library information.

801

802 **Supplementary file 2. Differential gene expression analysis of two contrasts between**  
803 **ancestral and evolved populations.** This file reports the results of DE analysis between anc.  
804 27 and evo. 4 (Table S2A) and between anc. 28 and evo. 9 (Table S2B).

805

806 **Supplementary file 3. F value on the gene expression of two contrasts between ancestral**  
807 **and evolved populations.** This file reports the results of gene expression variance  
808 comparisons between anc. 27 and evo. 4 (Table S3A) and between anc. 28 and evo. 9 (Table  
809 S3B).

810
